# Marginal Effects of Systemic CCR5 Blockade with Maraviroc on Oral Simian Immunodeficiency Virus Transmission to Infant Macaques

Egidio Brocca-Cofano,<sup>1,2</sup> Cuiling Xu,<sup>1,3</sup> Katherine S. Wetzel,<sup>4,5</sup> Mackenzie L. Cottrell,<sup>6</sup> Benjamin B. Policicchio,<sup>1,7</sup> Kevin D. Raetz,<sup>1,3</sup> Dongzhu Ma,<sup>1,3</sup> Tammy Dunsmore,<sup>1,2</sup> George S. Haret-Richter,<sup>1,2</sup> Karam Musaitif,<sup>8</sup> Brandon F. Keele,<sup>8</sup> Angela D. Kashuba,<sup>6</sup> Ronald G. Collman,<sup>4,5</sup> Ivona Pandrea,<sup>1,2,7</sup> and Cristian Apetrei<sup>1,3,7\*</sup>

<sup>1</sup>Center for Vaccine Research, University of Pittsburgh, Pittsburgh, PA; USA  
<sup>2</sup>Departments of <sup>2</sup>Pathology and <sup>3</sup>Microbiology and Molecular Genetics, School of Medicine, and <sup>7</sup>Department of Microbiology and Infectious Diseases, Graduate School of Public Health, University of Pittsburgh, Pittsburgh, PA, USA; Departments of <sup>4</sup>Medicine and <sup>5</sup>Microbiology, Perelman School of Medicine, University of Pennsylvania, Philadelphia, PA, USA; <sup>6</sup>Eshelman School of Pharmacy, University of North Carolina, Chapel Hill, NC, USA; <sup>8</sup>AIDS and Cancer Virus Program, Leidos Biomedical Research Inc., Frederick National Laboratory, Frederick, MD, USA

**The authors have declared that no conflict of interest exists**

**Keywords:** Simian immunodeficiency virus, rhesus macaques, oral transmission, real-time single genome amplification, CCR5 coreceptor, Maraviroc, target cells

|                     |           |                                       |
|---------------------|-----------|---------------------------------------|
| <b>Word counts:</b> | Abstract: | 188 words                             |
|                     | Text:     | 10993 words                           |
|                     | Figures:  | 7 (color) plus 4 Supplemental figures |
|                     | Tables:   | 1                                     |

**\*Corresponding author.** Present address:

Dr. Cristian Apetrei, M.D., Ph.D.

Center for Vaccine Research, University of Pittsburgh, 9044 Biomedical Science Tower 3, 3501 Fifth Avenue, Pittsburgh, PA 15261; Phone: +1-412-624-3235; Fax: +1-412-624-4440; E-mail: [apetreic@pitt.edu](mailto:apetreic@pitt.edu)

## 36 **Abstract**

37 Current approaches do not eliminate all HIV-1 maternal-to-infant transmissions (MTIT);  
38 new prevention paradigms might help avert new infections. We administered Maraviroc  
39 (MVC) to rhesus macaques (RMs) to block CCR5-mediated entry, followed by repeated  
40 oral exposure of a CCR5-dependent clone of simian immunodeficiency virus  
41 (SIV)mac251 (SIVmac766). MVC significantly blocked the CCR5 coreceptor in  
42 peripheral blood mononuclear cells and tissue cells. All control animals and 60% of  
43 MVC-treated infant RMs became infected by the 6th challenge, with no significant  
44 difference between the number of exposures ( $p=0.15$ ). At the time of viral exposures,  
45 MVC plasma and tissue (including tonsil) concentrations were within the range seen in  
46 humans receiving MVC as a therapeutic. Both treated and control RMs were infected  
47 with only a single transmitted/founder variant, consistent with the dose of virus typical of  
48 HIV-1 infection. The uninfected RMs expressed the lowest levels of CCR5 on the CD4<sup>+</sup>  
49 T cells. Ramp-up viremia was significantly delayed ( $p=0.05$ ) in the MVC-treated RMs,  
50 yet peak and postpeak viral loads were similar in treated and control RMs. In  
51 conclusion, in spite of apparent effective CCR5 blockade in infant RMs, MVC had  
52 marginal impact on acquisition and only a minimal impact on post infection delay of  
53 viremia following oral SIV infection. Newly developed, more effective CCR5 blockers  
54 may have a more dramatic impact on oral SIV transmission than MVC.

## 55 **Importance**

56 We have previously suggested that the very low levels of simian  
57 immunodeficiency virus (SIV) maternal-to-infant transmissions (MTIT) in African  
58 nonhuman primates that are natural hosts of SIVs are due to a low availability of target  
59 cells (CCR5<sup>+</sup> CD4<sup>+</sup> T cells) in the oral mucosa of the infants, rather than maternal and  
60 milk factors. To confirm this new MTIT paradigm, we performed a proof of concept  
61 study, in which we therapeutically blocked CCR5 with maraviroc (MVC) and orally  
62 exposed MVC treated and naïve infant rhesus macaques to SIV. MVC had only a  
63 marginal effect on oral SIV transmission. However, the observation that the infant RMs  
64 that remained uninfected at the completion of the study, after 6 repeated viral  
65 challenges, had the lowest CCR5 expression on the CD4<sup>+</sup> T cells prior to the MVC  
66 treatment, appear to confirm our hypothesis, also suggesting that the partial effect of  
67 MVC is due to a limited efficacy of the drug. Newly, more effective CCR5 inhibitors may  
68 have a better effect in preventing SIV and HIV transmission.

## 69 Introduction

70 Despite enormous success in preventing mother-to-infant-transmission (MTIT),  
71 recently, the World Health Organization (WHO) has intensified international efforts to  
72 significantly reduce or eliminate infection of infants. In 2013, UNAIDS reported that  
73 approximately 210,000 infants worldwide become HIV-infected annually (1). More than  
74 90% of these HIV-1 infections occur in sub-Saharan Africa. MTIT can occur *in utero*,  
75 directly by hematogenous transplacental spread or by infection of the amniotic  
76 membranes and fluid (2); during the delivery, by contact of the infant with maternal  
77 blood and cervicovaginal secretions (3, 4); or postnatally, through breastfeeding (5, 6).  
78 This later mode of transmission accounts for most MTIT cases and is difficult to prevent,  
79 because its mechanisms are not completely understood. Differently from HIV vaginal or  
80 rectal transmission, in which the virus-host interactions are intensively studied at the  
81 portal of entry (7), little emphasis has been placed on the role of infant mucosa in HIV  
82 breastfeeding transmission. This paucity of information is mainly due to the inherent  
83 limitations of sampling human infants. Further challenges to studying infant oral  
84 transmission include the long duration of exposure from breast milk and dramatic age-  
85 related changes in the infant mucosa during that time. In addition, most HIV-infected  
86 women are receiving some form of antiretroviral therapy (ART) or peripartum  
87 prophylaxis (8), which reduces MTIT but makes it more difficult to study break-through  
88 infections. As such, MTIT studies have focused almost exclusively on maternal  
89 virological and immunologic factors (9-11) and on immune effectors present in breast  
90 milk (12-16). High HIV-1 maternal plasma viral load (VLs) and low CD4<sup>+</sup> T cell counts in  
91 women that breastfeed are correlated with increased HIV breastfeeding transmission

92 (17, 18), but these correlations are not always substantiated, as mothers with low VLs  
93 can also transmit HIV by milk (17, 18). Conversely, 63% of the infants breastfed by  
94 mothers with  $<200$  CD4<sup>+</sup> T cells/ $\mu$ L and  $>10^5$  vRNA copies/ml remain uninfected (19).  
95 Furthermore, the correlation between milk viral shedding and plasma VL is weak and  
96 substantial discrepancies exist, with some women having low VLs in milk but high VLs  
97 in plasma, and *vice versa* (19). The rates of breastfeeding transmission are also  
98 correlated with the duration of lactation rather than the absolute CD4<sup>+</sup> T cell count (20).  
99 These data highlight the complex and dynamic process of infant oral transmission.

100 Breastfeeding transmission studies in macaques have also only focused on  
101 maternal and milk factors (13, 16, 21, 22). Neither maternal plasma VLs nor CD4<sup>+</sup> T  
102 cells clearly predict breastfeeding transmission in macaques, with only 20% of acutely-  
103 infected dams successfully transmitting infection. Importantly, over 50% of SIV  
104 breastfeeding transmissions occurred 9 months postdam infection, when the offspring  
105 are older, highlighting an age-related susceptibility to SIV infection, with higher doses of  
106 virus needed to infect younger RMs (23). Finally, it has been reported that occult  
107 peripartum/postpartum SHIV infection that may occur early may go undetected until  
108 later, suggesting that maturation of the immune system and generation of target cells in  
109 the infant are needed to support virus replication (21).

110 Our previous work in African nonhuman primates (NHPs) that are natural hosts  
111 of SIVs demonstrated that in these species MTIT of SIV is virtually nonexistent ( $<5\%$ )  
112 (24-26) and below the level targeted by the WHO for “virtual elimination” of HIV-1 MTIT  
113 in humans (27). The low levels of MTIT in natural hosts contrast with massive offspring  
114 exposure to SIV both *in utero* and through breastfeeding (25) due to the high SIV

115 prevalence in the wild (>80%) and high levels of acute and chronic viral replication in  
116 dams (25, 26). In African green monkeys (AGMs) and mandrills, resistance to SIV  
117 breastfeeding transmission is strongly associated with low levels of SIV target cells at  
118 the mucosal sites of the offspring (24). Furthermore, AGM-susceptibility to experimental  
119 SIV mucosal transmission is proportional to the availability of CD4<sup>+</sup> T cells expressing  
120 the SIV coreceptor CCR5<sup>+</sup> at the mucosal sites (28, 29).

121         Based on these observations, we hypothesized that the levels of target cells  
122 (CCR5<sup>+</sup> CD4<sup>+</sup> T cells) at the oral mucosa of breastfed infants may drive the efficacy of  
123 HIV/SIV transmission through breastfeeding and that the CCR5 blockade could  
124 represent a new potential therapeutic strategy to prevent HIV/SIV breastfeeding  
125 transmission. We tested this hypothesis in an infant RM model of HIV breastfeeding  
126 transmission (16), in which we administered Maraviroc (MVC) to block oral SIVmac  
127 transmission. MVC was shown to effectively block CCR5 expression in mucosal CD4<sup>+</sup> T  
128 cells, and prevent SIV transmission upon topic administration (30), but systemic CCR5  
129 blockade to prevent oral HIV/SIV transmission has never been performed. MVC has low  
130 toxicity (31) and high penetrability to the mucosal sites and is available for oral  
131 administration, thus being suitable for the use in infants. As such, we reasoned that  
132 demonstrating MVC efficacy in blocking oral HIV transmission may lead to an efficient  
133 way to prevent HIV breastfeeding transmission. We report here that, while systemic  
134 MVC administration to infant RMs was well tolerated and efficiently blocked CCR5 in  
135 peripheral blood and at mucosal sites, it had a minimal impact on viral acquisition and  
136 only marginally impacted post infection delay of viremia. The infant RMs that remained  
137 uninfected at the completion of the study had the lowest CCR5 expression on the CD4<sup>+</sup>

138 T cells prior to the MVC treatment, confirming our hypothesis that the availability of  
139 target cells may drive the efficacy of SIV/HIV breastfeeding transmission, also  
140 suggesting that the partial effect of MVC is due to a limited efficacy. Newly, more  
141 effective CCR5 inhibitors may have a better effect in preventing SIV and HIV  
142 transmission.

143

## 144 **Results**

145 **Study design.** To investigate whether or not blockade of the mucosal target cells  
146 can prevent/reduce HIV/SIV oral transmission, five infant RMs were administered MVC  
147 at a total daily dose of 300 mg/kg bid (150 mg/kg given twice daily), by mouth with food,  
148 for up to 4 months. One month after MVC initiation, the treated infants, together with  
149 four uninfected controls, received 10,000 IU of SIVmac766XII (a synthetic swarm of the  
150 transmitted/founder SIVmac766 clone) (Figure 1) (32) via oral, atraumatic  
151 administration. Viral challenges were repeated every two weeks until all the controls  
152 became SIV-infected (after the 6<sup>th</sup> challenge).

153 At the time of viral challenges, MVC was dosed in circulation in all the MVC-  
154 treated infant RMs. Due to the nature of the study, which involved repeated oral  
155 challenges, we did not collect oral or tonsil biopsies to dose the MCV at the site of virus  
156 exposure, to avoid increasing the risk of SIV transmission. However, we assessed the  
157 MVC concentration in tissues (including tonsils) in two additional MVC-treated SIV-  
158 unchallenged infant RMs, which were followed in the same conditions as the infants in  
159 the study group.

160 Blood (1.5 ml) was collected into EDTA-Cell Preparation Tubes (CPTs) from all  
161 the infant RMs receiving MVC at the time of challenge, to monitor coreceptor occupancy  
162 (33) and measure the plasma concentrations of MVC. Blood was then collected every  
163 three days to detect the SIV infection. Once an animal was diagnosed as SIV-infected,  
164 frequent blood samples were collected to monitor the acute and early chronic infection  
165 (10, 17, 24, 31, 38, 45, 59 day postinfection, dpi). Superficial lymph nodes (LNs), tonsils  
166 and gut biopsies were collected only from the RMs in the MVC-treated control group.

167

168 **Orally administered MVC is well tolerated by infant RMs.** Throughout the  
169 MVC treatment (up to 101 days), all infant RMs receiving MVC were closely monitored  
170 for clinical or biological signs suggestive of side or adverse effects of the MVC. No such  
171 signs being observed, we concluded that oral administration of MVC was safe and well  
172 tolerated by infant RMs.

173

174 **Pharmacokinetics (PK) of MVC in plasma and tissues.** The PK profile of MVC  
175 was evaluated in all the infant RMs from the study group by measuring the MVC plasma  
176 concentrations 4 hours after the morning administration, when we expected drug levels  
177 to be maximal and when viral challenges were performed. Additional testing of the MVC  
178 plasma concentrations was performed at 2, 3 and 7 days postviral challenge, just before  
179 the morning administration of the MVC, when we expected the plasma concentrations to  
180 be minimal (Figure 2). The medians and ranges plasma MVC concentrations at the time  
181 of each of the 6 virus challenges were respectively of 410 (77-1040), 886 (29-1910),



182 115 (23-267), 1960 (815-3720), 1435 (5-5340) and 64 (27-1520) ng/ml, respectively  
183 (Figure 2). In the unchallenged MVC-treated controls, plasma MVC concentrations were  
184 in the same range: 248 and 261 ng/ml (Figure 3A). These levels are similar to the range  
185 seen in humans receiving a single 300 mg dose of MVC (618-888 ng/ml) (34, 35). The  
186 medians and ranges of the MVC concentrations in plasma just prior to the morning dose  
187 (the minimal coverage concentration) were of 59 (25-271), 46 (15-214), 28 (13-144), 11  
188 (5-21), 33 (21-62) and 25 (19-44) ng/ml at 3 days post-challenges, demonstrating a  
189 steady and measurable MVC trough levels. In the MVC-treated controls, the minimal  
190 concentrations of MVC were of 207 and 33 ng/mL (Figure 3A). Overall, these levels  
191 were slightly lower than those measured at the same interval post-MVC administration  
192 in humans receiving a single 300 mg dose (34-43 ng/mL) (34, 35).

193 At 4 hours after the drug administration, the MVC concentrations in the tissues  
194 collected from the MVC-treated controls were 689 and 1597 ng/g in the LNs, 597 and  
195 759 ng/g in the tonsils, and 998 and 17,869 ng/g in the gut (Figure 3B). The MVC  
196 concentrations in tissues immediately prior to the morning dose were 136 and 958 ng/g  
197 in the LNs, 5 and 122 ng/g in tonsils, and 1,046 and 2,322 ng/mL in the gut (Figure 3B).  
198 In only two of the collected samples (plasma from RM28 2 days postchallenge 4 and  
199 tonsil from RM1) MVC concentrations were below the 5 ng/ml limit of quantification  
200 (BLQ) of the method used (Figures 2 and 3). We imputed a numerical value for these  
201 samples (5 ng/ml) because it was within 20% of the low limit of quantification (LLOQ)  
202 (36). Interestingly, in RM28, the MRV concentration below the limit of quantification was  
203 followed by SIV infection (Figure 2).

204 Taken together, these data demonstrate that an oral MVC dose of 150 mg/kg bid  
205 given to infant RMs 4 hours prior to the viral challenge, approximated plasma MVC  
206 concentration in humans; that the tissue concentrations of MVC were similar to those  
207 observed in humans (37) and high enough to block CCR5, and that the minimal  
208 concentrations of MVC were generally sufficient to compete with the virus for CCR5  
209 coreceptor occupancy, albeit the concentrations of MVC decreased dramatically prior to  
210 the daily administration, in some instances, below 5 ng/ml.

211

212 **Orally administered MVC effectively blocks CCR5 expression on the**  
213 **surface of CD4<sup>+</sup> T cells.** To investigate whether or not CCR5 blockade with MVC  
214 impacts oral SIV transmission to infant RMs, we first determined the therapeutic impact  
215 of MVC by measuring the CCR5 receptor occupancy in blood, LNs, tonsil and gut. This  
216 test monitors the levels of internalization of CCR5 receptors on the surface of CD4<sup>+</sup> T  
217 cells following *ex vivo* MIP-1 $\beta$  exposure, which are indicative of the level of receptor  
218 occupancy. Complete prevention of CCR5 internalization indicates complete coreceptor  
219 occupancy.

220 Close monitoring of CCR5 occupancy on the surface of circulating CD4<sup>+</sup> and  
221 CD8<sup>+</sup> T cells (Figure 4) identified significant differences between MVC-treated and  
222 untreated groups before the first viral challenge (CD4<sup>+</sup> T cell CCR5 occupancy  
223  $p=0.0159$ ; CD8<sup>+</sup> T cell CCR5 occupancy  $p=0.0317$ ), before the second viral challenge  
224 (CD4<sup>+</sup> T cell CCR5 occupancy  $p=0.0317$ ; CD8<sup>+</sup> T cell CCR5 occupancy  $p=0.0159$ ), and  
225 before the third viral challenge (CD4<sup>+</sup> T cell CCR5 occupancy  $p=0.0286$ ; CD8<sup>+</sup> T cell

226 CCR5 occupancy  $p=0.0159$ ) (Figure 4A and B). For the remaining 3 challenges,  
227 statistical analyses could not be performed because the number of uninfected RMs  
228 were too low.

229 In the MVC-treated controls, MVC blocked efficiently CCR5 on CD4<sup>+</sup> T cells in all  
230 tissue samples analyzed (Figure 4C and D). In the gut, CCR5 blockade was not  
231 complete, even though blocking efficiency was high with average levels of 96% when  
232 the MVC concentration was expected to be high (Figure 4C) and 88% when the MVC  
233 concentration was expected to be low (Figure 4D). Similarly, MVC partially blocked the  
234 CCR5 expression on the CD8<sup>+</sup> T cells (Figure 4E and F), with an average CCR5  
235 occupancy of 91% (when the MVC concentration was expected to be high) and 63%  
236 (when the MVC's concentration was expected to be low) in whole blood; blockade was  
237 of 102% and 95% in the LNs; 95% and 91% in the tonsil and 95% and 91%,  
238 respectively in the gut (Figure 4).

239

240 **Systemic MVC administration only marginally impacted oral SIVmac**  
241 **transmission to infant RMs.** The main goal of this study was to investigate whether or  
242 not CCR5 blockade with MVC impacts oral SIV transmission to infant RMs. MVC-  
243 treated and control infant RMs were repeatedly challenged with 10,000 IU of  
244 SIVmac766XII, orally, in an atraumatic fashion, until all 4 RM controls became infected  
245 (6 challenges). At the end of the challenge experiments, 3/5 (60%) of the MVC-treated  
246 infant RMs were also SIV-infected, while 2/5 infant RMs remained uninfected, in spite of  
247 being challenged 6 times under the same conditions (Figure 2). However, the levels of

248 protection in the MVC-treated RMs were not significant ( $p=0.15$ ). We conclude that  
249 systemic MVC administration does confer a significant protection of the infant RMs  
250 against oral SIVmac challenge. This conclusion is also supported by the observation  
251 that the number of exposures necessary to infect the infant RMs in the two groups were  
252 similar, control infant RMs becoming infected after 1, 3, 5 and 6 SIVmac766XI oral  
253 challenges, respectively, and the MVC-treated infant RMs becoming infected after 2, 3  
254 and 4 inoculations.

255 We next sought to correlate the efficacy of the SIVmac766XII transmission  
256 (estimated based on the number of virus challenges) with the availability of CCR5<sup>+</sup>  
257 CD4<sup>+</sup> T target cells. This analysis was prompted by our previous correlative studies in  
258 natural hosts of SIVs that found strong correlations between the target cell availability at  
259 mucosal sites and the efficacy of mucosal (intrarectal, intravaginal and oral)  
260 transmission (24, 28). We assessed CCR5 expression on circulating CD4<sup>+</sup> T cells of the  
261 infant RMs prior to the MVC treatment and correlated it to the number of viral exposures  
262 prior to infection. In a conservative approach, we listed the uninfected RMs as infected  
263 at the seventh challenge. These two variables were very strongly correlated ( $p=0.0036$ )  
264 (Figure 5), confirming our hypothesis and strongly supporting the paradigm that target  
265 cell availability determines susceptibility to infection in natural hosts of SIVs.

266

267 The SIVmac766XII stock consists of a swarm of 12 viral variants equally  
268 represented and phenotypically matched allowing for variant enumeration (Figure 1)  
269 (38), therefore the number of transmitted viral variants in the MVC-treated group and

270 the untreated controls were determined. The number of transmitted/founder lineages,  
271 did not identify any difference in the number of transmitted variants between the two  
272 groups, with each animal being infected with only one of the 12 possible variants. This  
273 result suggests that the infant RMs were not overexposed to virus, which could have  
274 offset the protective effect of MVC.

275

276 **SIVmac766XII uses CCR5 and GPR15 to enter transfected target cells.** To  
277 understand why the MVC administration only marginally impacted oral SIV transmission  
278 in infant RMs, we first investigated the coreceptor usage of SIVmac766XII. Several  
279 SIVsmm strains from sooty mangabeys were reported to use CXCR6 (39, 40), which, if  
280 true for SIVmac, could have resulted in a more promiscuous coreceptor use and the  
281 inefficacy of the CCR5 blockade. First, we assessed SIVmac766XII coreceptor usage in  
282 a CF2th-Luc reporter cells system, and documented robust viral entry through both RM  
283 CCR5 and RM GPR15 (Figure 6), but only minimal entry through RM CXCR6, and no  
284 virus entry through RM CXCR4, in agreement with previous studies of coreceptor usage  
285 of the SIVmac strains (39). As controls, other SIVsmm strains showed a robust entry  
286 through sooty mangabey CXCR6 (SM CXCR6, black bar, Figure 6) as previously reported  
287 (40).

288

289 **CCR5 is the main coreceptor used by SIVmac766XII to infect primary RM**  
290 **PBMCs.** We further assessed the SIVmac766XII coreceptor usage during infection of RM  
291 primary lymphocytes. PBMC from two different RMs were infected with SIVmac766XII in

292 the presence or absence of MVC, and virus replication was monitored by measuring p27  
293 Gag antigen in the supernatant. As shown in **Figure 6B**, MVC blocking of CCR5 virtually  
294 abolished infection of primary lymphocytes, with 94-99% reduction of replication at 7 dpi  
295 (**Figure 6C**). We therefore concluded that CCR5 is the main coreceptor for SIVmac766XII  
296 in primary PBMC, despite *in vitro* use of both RM CCR5 and RM GPR15 in transfected  
297 cells. This finding is concordant with previous results that SIVmac is dependent on CCR5  
298 for primary lymphocyte infection (40, 41). As such, our results showed that SIVmac766XII  
299 is an appropriate viral strain to model oral transmission of HIV-1.

300

301 **Postinfection effects of the MVR treatment.** We further analyzed the impact of  
302 the MVC treatments on the natural history of SIV infection in infant RMs. In these  
303 studies we included the three MVC-treated the four untreated infant RMs that became  
304 infected with SIVmac766XII.

305

306 **MVC treatment delayed ramp-up viremia.** A significant delay of the ramp-up  
307 VLs was observed in the MVC-treated infants ( $p=0.05$ ) (**Figure 7**). In addition to the  
308 delay in ramp-up dynamics, the peak VL for MVC-treated animals was reached at 21  
309 days postinfection (dpi) compared to 18 dpi peaks of the control RMs. However, the  
310 MVC effects on timing and magnitude of pVL postpeak resolution and later in infection  
311 were not significantly different between the two groups (**Figure 7**).

312

313 **MVC treatment did not alter the dynamics of the peripheral CD4<sup>+</sup> and CD8<sup>+</sup>**  
314 **T cell populations or subsets in SIV-infected infant RMs.** In humans, MVC treatment  
315 does not significantly impact CD4<sup>+</sup> and CD8<sup>+</sup> T cell populations (42). The peripheral  
316 CD4<sup>+</sup> (Figure 8A) and CD8<sup>+</sup> (Figure 8B) T cell counts were compared throughout the  
317 follow-up between MVC-treated and untreated RMs, and no significant difference was  
318 observed between the two groups (Figure 8). Peripheral CD4<sup>+</sup> T cell depletion was  
319 transient, the CD4<sup>+</sup> T cell counts being partially restored by 24 dpi in both groups and  
320 declining slowly during the follow-up (Figure 8A).

321 We next monitored the impact of MVC treatment on the memory subsets of CD4<sup>+</sup>  
322 and CD8<sup>+</sup> T cells prompted by a recent report that CCR5 blockade *in vivo* might affect  
323 the trafficking of memory T cells expressing CCR5 to the site of the cognate antigen,  
324 preventing their proper stimulation, acquirement of effector functions and antiviral  
325 activity (43). However, comparison between MVC treated and untreated infant RMs  
326 throughout the follow-up did not reveal any significant difference in the peripheral naïve  
327 (CD28<sup>+</sup> CD95<sup>neg</sup>), central memory (CD28<sup>+</sup> CD95<sup>+</sup>) and effector memory (CD28<sup>neg</sup>  
328 CD95<sup>+</sup>) subsets of CD4<sup>+</sup> or CD8<sup>+</sup> T cells (data not shown). Our data indicate that MVC  
329 treatment had no discernible impact on the major T cell populations and subsets in the  
330 SIV-infected infant RMs.

331

332 **MVC administration did not impact the levels of circulating CD4<sup>+</sup> and CD8<sup>+</sup>**  
333 **expressing CCR5 in SIV-infected infant RMs.** CCR5 expression on the surface of  
334 CD4<sup>+</sup> T cells is highly variable, depending on CCR5 polymorphisms and expression of

335 its chemokine ligand (44, 45), leading to variations in HIV target cell availability, that  
336 impact virus entry, susceptibility to infection (46), and the therapeutic efficacy of CCR5  
337 inhibitors (47). We therefore monitored CCR5 expression on both CD4<sup>+</sup> and CD8<sup>+</sup> T  
338 cells throughout the follow-up (Figure 9) and report that they were similar between the  
339 two groups, being increased during the first weeks of treatment (Figure 9) and returning  
340 to preinfection levels by 28 dpi. The CD4<sup>+</sup> T cells expressing CCR5 gradually declined  
341 during the follow-up (Figure 9A and B) likely as a result of the direct virus targeting of  
342 the CD4<sup>+</sup> T cells expressing CCR5.

343

344 **MVC treatment had no discernable impact on the levels of T cell activation**  
345 **and proliferation in SIV-infected infant RMs.** These analyses were prompted by  
346 studies reporting either that MVC treatment results in a resolution of chronic immune  
347 activation that goes beyond the levels of viral control (48) or, conversely, that MVC  
348 administration increases the levels of T-cell activation (49). While SIV infection was  
349 associated in both MVC treated and untreated RMs with increased levels of CD4<sup>+</sup> and  
350 CD8<sup>+</sup> T cell proliferation (Figure 10A and B) and immune activation (Figure 10C and D),  
351 no significant difference was observed throughout the follow-up between the two  
352 groups. We conclude that MVC administration did not significantly influence the levels of  
353 CD4<sup>+</sup> and CD8<sup>+</sup> T cell immune activation and proliferation in SIV-infected infant RMs.

354

355

356



## 357           **Discussion**

358           While breastfeeding is the healthiest practice for feeding infants, breast milk can  
359 also transmit SIV/HIV infection when mothers are infected (50). Without prevention, 13-  
360 48% of babies born to HIV-1-infected mothers become HIV infected (4). Perinatal  
361 administration of short-term ART to HIV-infected mothers dramatically decreases the  
362 rates of HIV-1 MTIT (51). Yet, even with ART prophylaxis, breastfeeding transmission  
363 accounts for half of the MTIT cases (52), with overall HIV breastfeeding transmission  
364 rates being of approximately 13%, higher in the mothers that seroconvert postpartum  
365 (29%) (52) or are in the AIDS stage (37%) (53). Administration of ART to breastfeeding  
366 mothers and prolonged ART prophylaxis to infants significantly impacted HIV  
367 breastfeeding transmission (54), but this strategy has yet to assess the rates of residual  
368 transmission; the degree of drug toxicity on the infant; and the risk for  
369 transmission/selection of drug-resistant viruses. Also, to be effective, this strategy has  
370 still to circumvent multiple barriers related to implementation (27).

371           HIV breastfeeding transmission is devastating in developing countries, where  
372 95% of babies are breastfed for up to 2 years (55) and where the benefits of  
373 breastfeeding outweigh the risks of breastfeeding transmission (55), as the use of  
374 replacement feeding is hindered by access to clean water, cost, availability of formula  
375 and cultural background (51). Strategies allowing HIV-infected mothers to breastfeed,  
376 while completely controlling breastfeeding transmission, are badly needed.

377           The rates of SIV MTIT are negligible in African NHP species (AGMs, mandrills or  
378 sooty mangabeys) that are natural hosts of SIVs (24-26, 56), in spite of the fact that milk

379 VLs are comparable to those observed in pathogenic infections (57). In experimental  
380 studies, we failed to document any SIV breastfeeding transmission in mandrills, even  
381 during the acute infection of lactating dams (24). Meanwhile, these low rates of SIV  
382 breastfeeding transmission are associated with low levels of mucosal target cells (24,  
383 26), and we documented that, in experimental conditions, susceptibility to mucosal SIV  
384 infection of natural hosts is age-related and correlates with the availability of target cells  
385 at the mucosal sites (28). These features led us to hypothesize that the mucosal milieu  
386 of breastfed infant represent an effective barrier to HIV breastfeeding transmission and  
387 that the experimental blockade of mucosal target cell availability may represent an  
388 effective new strategy to prevent HIV breastfeeding transmission.

389         There are multiple rationales for blocking CCR5 to prevent HIV transmission, the  
390 most important of which being that CCR5 is the main coreceptor for HIV-1 (58, 59),  
391 being thus relevant for the first steps of infection; furthermore, transmitted/founder  
392 viruses always use CCR5 for virus entry (60). CCR5 antagonists inhibit replication of  
393 R5-tropic HIV variants by blocking viral entry into the target cells (61). MVC is the only  
394 FDA-approved CCR5 antagonist (62) and blocks HIV-1 entry by binding CCR5 and  
395 suppressing viral infection (63). In addition to modulating CCR5 expression and function  
396 (64), MVC may have immunomodulatory effects by blocking binding of the natural  
397 ligands of CCR5 (MIP-1 $\alpha$ , MIP-1 $\beta$  and RANTES) (65). As a result, CCR5 blockade in  
398 HIV-infected subjects reduces immune activation and improve CD4<sup>+</sup> T cell restoration  
399 (66, 67). For the CCR5 blockade, we used MVC, which is FDA-approved, reasoning  
400 that, if proven effective, our strategy could be readily implemented to prevent HIV  
401 breastfeeding transmission.

402           Similar to previous studies on MVC safety and tolerance (68, 69), orally  
403 administered MVC was safe and well tolerated in all infant RMs, without any obvious side  
404 effects, adverse reactions or an impact on the development of the immune system of the  
405 infants due to the blockade of a chemokine that may decisively contribute to the immune  
406 system maturation (70). As such, we concluded that prolonged CCR5 blockade did not  
407 have any deleterious effects on the immune effectors.

408           Surprisingly, systemic MVC administration only marginally impacted oral SIVmac  
409 transmission to infant RMs. At the end of the SIV challenge experiments, when all the  
410 RMs in the untreated control group were infected with SIVmac, 60% (3 out of 5 RMs) of  
411 the MVC-treated infant RMs were also infected. Furthermore, MVC treatment had no  
412 effect on the number of viral challenges needed to transmit SIV or the outcome of SIV  
413 infection in infant RM. The only discernible difference observed between the SIV-infected  
414 MVC-treated and untreated infant RMs was a significant delay of ramp-up viremia in the  
415 MVC-treated infants.

416           This lack of efficacy of MVC in preventing oral SIV transmission to infant RMs and  
417 its limited impact on the key parameters of SIV infection in SIV-infected infant RMs might  
418 be due to multiple causes, such as: (i) underdosing of MVC which could limit its  
419 therapeutic efficacy; (ii) overexposure to the virus during the challenge experiments,  
420 which might have offset the effects of MVC; and (iii) biological promiscuity of SIVs, that  
421 may use other coreceptors than CCR5 to infect its target cells (71-73). To examine our  
422 MVC dosing strategy, we performed two sets of experiments: first, as the MVC  
423 interactions with CCR5 might be different in macaques compared to humans, we sought  
424 to demonstrate that MVC successfully blocks CCR5 in infant RMs and to this end we

425 performed an occupancy test (69). In this test, the binding of MVC to CCR5 coreceptors  
426 prevents internalization of CCR5 by MIP-1 $\beta$  and thus, the degree of CCR5 internalization  
427 by MIP-1 $\beta$  provides an indirect measurement of MVC binding to CCR5. The occupancy  
428 test demonstrated that, at the time of viral challenge, 4 hours after oral administration of  
429 MVC, CCR5 internalization was robustly blocked. Similarly, testing of the samples  
430 collected just prior to drug administration showed that the minimal levels of MVC were  
431 generally sufficient to compete with the virus for CCR5 coreceptor occupancy. Note,  
432 however, that the lowest coreceptor occupancy was observed in tonsils, a potential site  
433 of virus entry upon oral transmission (74).

434         Next, we measured the MVC plasma concentrations at the time of virus challenge  
435 and we documented that steady-state exposure of MVC was similar to therapeutic  
436 concentrations in HIV-infected patients. In a different group of infant RMs, we performed  
437 MVC dosage in tissues and showed that the drug reaches steady levels in both tonsils  
438 and at the mucosal sites, suggesting that the dose of MVC employed here was sufficient  
439 to realize a clinical effect. We noted, however, that the minimal levels of MVC, measured  
440 just prior to the morning administration of the drug were low and, at least in two instances,  
441 below the limits of detection of the assay. Interestingly, the infant RMs which remained  
442 uninfected at the completion of the study also had very low minimal levels of MVC,  
443 suggesting that the clinical dose used here is probably sufficient for prevention.  
444 Nevertheless, drug monitoring revealing a relatively abrupt decline in the MVC levels in  
445 infant RMs may also point to a different metabolism of the drug in RMs compared to  
446 humans, thus calling for a more detailed evaluation. This aspect is particularly important,

447 as the MVC effect observed here was marginal and, in one case (RM28), a documented  
448 undetectable plasma level of MVC was followed by SIV infection.

449 To rule out virus overdosing, we performed single genome amplification of the  
450 molecular tag (32, 75) and showed that none of the MVC-treated or control infant RMs  
451 were infected with more than one viral variant, thus discarding the eventuality of an  
452 SIVmac overexposure that could have offset the protective effect of MVC.

453 Finally, to discard the hypothesis of a more promiscuous receptor usage of SIVmac  
454 compared to HIV-1, we assessed the coreceptor usage of SIVmac766XII. Differently from  
455 HIV-1, which uses CCR5 as the main coreceptor and may expand to use CXCR4 in  
456 advanced stages of infection, the majority of SIV strains are more promiscuous, being  
457 able to use, in addition to CCR5, BOB/GPR15, (76, 77) and Bonzo/STRL33 (78, 79) for  
458 efficient entry into the target cells. More recently, multiple SIV strains were reported to  
459 use alternative coreceptors for viral entry, most notably CXCR6 (71-73, 80). This  
460 coreceptor usage pathway was reported for the SIVs isolated from both AGMs and sooty  
461 mangabeys (71, 73, 80). However, testing of our viral stock for coreceptor usage, clearly  
462 demonstrated that CCR5 is the only coreceptor used by SIVmac766XII *in vivo*, similar to  
463 the transmitted/founder HIV-1 strains, and validating our choice of challenge strain. While  
464 SHIV env strains might have been preferable to SIVmac in this study, fully functional  
465 transmitted/founder SHIVs only became available after the completion of this study (81,  
466 82)

467 As such, our study indicates that MVC was relatively efficient in blocking CCR5  
468 and well tolerated in infant RMs, but exerted only a marginal effect on SIV oral  
469 transmission. Failure to block infection was not due to underdosing of MVC, overexposure

470 to the virus during the challenge phase, or alternative coreceptor usage. While a more  
471 rapid MVC metabolism in RMs might have impacted MVC efficacy to prevent infection,  
472 additional studies would be needed to explore the prophylactic efficacy of target cell  
473 blockade for preventing oral HIV transmission through breastfeeding.

474 Finally, note that systemic administration of MVC did not prevent intrarectal  
475 transmission of SHIV (37). Furthermore, CCR5 blockade with MVC was reported to be  
476 ineffective in preventing rectal HIV transmission in humans (83). As such, it is possible  
477 that CCR5 blockade by MVC is not sufficiently effective in preventing HIV transmission  
478 and ineffective in blocking the CCR5 and the use of newly, more potent CCR5 inhibitors  
479 will have a better effect in preventing oral SIV transmission, as recently suggested (84).

480

## 481 **Material and Methods**

482 ***Ethics statement.*** Eleven RMs aged six month old were included in this study.  
483 They were all housed and maintained at the Plum Borough animal facility of the University  
484 of Pittsburgh in agreement with the standards of the Association for Assessment and  
485 Accreditation of Laboratory Animal Care (AAALAC). The RMs were fed and housed  
486 according to regulations set forth by the Animal Welfare Act and the *Guide for the Care*  
487 *and Use of Laboratory Animals* (85). The RM infants were socially housed indoors in  
488 stainless steel cages, had 12/12 light cycle, were fed twice daily, water was provided ad  
489 libitum. They were also given various toys and feeding enrichments. The animals were  
490 observed twice daily and any signs of disease or discomfort were reported to the  
491 veterinary staff for evaluation. For sample collection, animals were anesthetized with 10

492 mg/kg ketamine hydrochloride (Park-Davis, Morris Plains, NJ, USA) or 0.7 mg/kg  
493 tiletamine hydrochloride and zolazepan (Telazol, Fort Dodge Animal Health, Fort Dodge,  
494 IA) injected intramuscularly. After viral challenge, all the infant RMs that became infected  
495 were followed for 120 days and sacrificed by intravenous administration of barbiturates  
496 prior to the onset of any clinical signs of disease. The animal studies were approved by  
497 the University of Pittsburgh Institutional Animal Care and Use Committee (IACUC)  
498 (Protocol #13112685).

499

500 **Virus stock.** The SIVmac766XII stock (Figure 1) is composed of parental  
501 SIVmac766, previously identified as a transmitted/founder virus and infectious molecular  
502 clone (38) and eleven other viral variants differing from the parental clone by 3  
503 synonymous mutations in integrase similar to the SIVmac239X swarm previously  
504 described (32). The virus stock was generated by transfecting 293T cells with equal  
505 amounts of each of the 12 molecularly modified plasmids for 24 h using the TransIT HEK-  
506 293 transfection reagent (Mirus Bio) according to the manufacturer's instructions. Culture  
507 medium was changed at 24 h post-transfection and again at 48 h posttransfection. At 72  
508 h posttransfection, virus-containing supernatant was clarified by centrifugation, sterile-  
509 filtered through a 0.45  $\mu$ M filter, aliquoted, and stored at -80°C. A series of small scale  
510 cotransfections with subsequent sequencing analyses to determine the relative  
511 proportion of each tagged variant in the virus pool was used to identify the relative input  
512 proportion of each plasmid in the DNA cotransfection pool that would yield roughly equal  
513 proportions of tagged viruses in the SIVmac766XII stock. Virus titers were determined  
514 using TZM-bl reporter cells (NIH AIDS Research and Reference Reagent Program),

515 which contain a Tat-inducible luciferase and a  $\beta$ -galactosidase gene expression cassette.  
516 Infectious titers were measured by counting individual  $\beta$ -galactosidase-expressing cells  
517 per well in cultures infected with serial 3-fold dilutions of virus. Wells containing dilution-  
518 corrected blue cell counts within the linear range of the virus dilution series were averaged  
519 to generate an infectious titer in infectious units (IU) per milliliter. The SIVmac766XII stock  
520 contained  $2.75 \times 10^5$  IU/ml.

521

522 ***MVC treatment and animal infection.*** Five RMs received a total daily dose of 300  
523 mg/kg administered as two divided doses (150 mg/kg) per os with food. The MVC dose  
524 was allometrically scaled to twice the dose of humans (300 mg/kg). One month after MVC  
525 initiation, all the MVC-treated infants, together with 4 untreated infant RMs were orally  
526 administered 10,000 IU of SIVmac766XII. Virus challenge occurred 4 hours after the  
527 morning MVC administration, when the concentrations of MVC were demonstrated to be  
528 maximal. Viral challenge was repeated every two weeks, for up to 6 times. At the time of  
529 viral challenges, CCR5 coreceptor occupancy (33) was also closely monitored. To  
530 evaluate the concentration and pharmacokinetics of the MVC in the tissues, we enclose  
531 in our experimental design two RMs treated with MVC similarly to the infants in the study  
532 group, but not challenged.

533

534 ***Sampling.*** At the time of virus challenge, blood (1.5 ml) was collected into EDTA-  
535 CPTs, to monitor coreceptor occupancy and MVC plasma levels, and then every three  
536 days, to monitor SIV infection. Once an animal was demonstrated to be SIV infected,



537 sampling was scheduled to monitor the acute and early chronic infection (10, 17, 24, 31,  
538 38, 45, 59 dpi). Superficial LNs, tonsils and intestine were collected just from the two  
539 MVC-treated SIV-unexposed infant RM controls. To prevent changes in CCR5 expression  
540 due to storage and shipping of unprocessed peripheral blood mononuclear cells, all blood  
541 and tissue samples were processed within 60 min from collection.

542

543 ***Analysis of plasma MVC concentration.*** MVC concentrations were measured in  
544 plasma samples collected 4 hours after administration of one oral dose of 150 mg/kg by  
545 a validated liquid chromatography–tandem mass spectrometry (LC-MS/MS) method  
546 using a Shimadzu high-performance liquid chromatography system for separation, and  
547 an AB SCIEX API 5000 mass spectrometer (AB SCIEX, Foster City, CA, USA) equipped  
548 with a turbo spray interface for detection. The calibrated linear range was 5-5000 ng/ml  
549 in plasma. All samples were extracted by protein precipitation with a stable, isotopically-  
550 labeled internal standard (MVC-d6) added for quantification. All calibration standards and  
551 quality controls (QCs) were prepared in drug-free NHP plasma. Calibration standards and  
552 QC samples met 15% acceptance criteria for precision and accuracy. Plasma MVC  
553 concentrations were expressed as ng of MVC per ml.

554

555 ***Analysis of tissue MVC concentration.*** MVC concentrations in LNs, tonsils and  
556 intestine were measured on samples collected either 4 hours after administration of an  
557 oral dose of 150 mg/kg MVC, or immediately before MVC administration. Tissue MVC

558 concentrations were measured with the same methodology used to measure plasma  
559 MVC concentrations and were expressed as ng of MVC per gr of tissue (ng/gr of tissue).

560

561 ***MIP-1 internalization assay.*** The coreceptor occupancy test was performed to  
562 assess MVC binding to CCR5 in blood and in LNs, tonsils and intestine (33, 69, 86). The  
563 principle of this test is that the binding of MVC prevents internalization of CCR5 by MIP-  
564 1 $\beta$  and thus, the degree of CCR5 internalization by MIP-1 $\beta$  provides an indirect  
565 measurement of MVC binding to CCR5.

566 PBMC-rich plasma samples were isolated by centrifugation of CTP tube at 2,200  
567 rpm x 25 minute. The cell pellets were resuspended in the plasma at  $5 \times 10^6$  cell/ml  
568 obtaining cell-enriched plasma samples. For the assay in blood,  $5 \times 10^5$  cell-enriched  
569 plasma sample (100  $\mu$ l) was aliquoted into three separately labeled 5 ml Facs tubes  
570 containing the isotype control (Tube 1), the MVC-stabilized CCR5 (Tube 2) and the test  
571 sample (Tube 3). Cells from LNs, tonsils and intestinal biopsies were collected as  
572 described (87) and  $5 \times 10^6$  cells were resuspended in the plasma and aliquoted (100  $\mu$ l)  
573 in three tubes as described above for blood. Fifty  $\mu$ l of MVC 1 $\mu$ M (CCR5 stabilizing  
574 solution) were added to Tube 2; the same volumes of 50  $\mu$ l of 1% PBS/BSA (w/v) were  
575 added to Tube 1 and 3. Tubes 1-3 were briefly vortexed and incubated at 37 $^{\circ}$ C for 30  
576 min, followed by centrifugation at 1500 rpm for 5 min. The supernatant was discarded,  
577 and 15  $\mu$ l of MIP-1 $\beta$  (100 nM) was added to all tubes. The mixture was then vortexed and  
578 incubated uncapped for 45 min at 37 $^{\circ}$ C to enable CCR5 internalization. Then, one ml of  
579 0.5% paraformaldehyde in PBS was added to each tube, which were then vortexed and

580 incubated in the dark at room temperature (RT) for 10 min. Cells were then washed with  
581 PBS by centrifugation at 1500 rpm for 5 min, and stained with a combination of antibodies  
582 (**Table 1**) appropriate for the identification of CD4<sup>+</sup> and CD8<sup>+</sup> T cells expressing CCR5,  
583 and a combination of isotype and fluorescence-minus-one controls. Labeled cells were  
584 washed once with 1% FBS PBS, fixed in 2% formaldehyde PBS (Affimetrix, Santa Clara,  
585 CA) and then acquired the same day on a custom four-laser BD LSRII instrument (BD  
586 Bioscience). Only singlet events were gated and a minimum of 250,000 live CD3 cells  
587 were acquired. Populations were analyzed using FlowJo software version 7.6.5 (Tree Star  
588 Inc. Ashland, OR) and the graphs were generated with GraphPad Prism 6.04. The  
589 percentage of receptor occupancy was calculated using CCR5 expression data obtained  
590 for PBL aliquots incubated with chemokine in the presence of 1  $\mu$ M MVC (Tube 2) and in  
591 the absence of additional MVC (Tube 3), as follows: % receptor occupancy = (% of CCR5  
592 expression in Tube 3)/(% of CCR5 expression in Tube 2) $\times$ 100.

593

594 ***Alternative coreceptor usage by SIVmac76XII in CF2th-Luc cells.*** CF2th-Luc  
595 cells, which contain a Tat-driven luciferase reporter, were transfected using Fugene 6  
596 (Promega) with two expression plasmids: one containing RM CD4 and one containing  
597 coreceptor (or pcDNA3.1 empty vector). Cells were infected 48 hours later with  
598 SIVmac766XII (using 2,750, 13,750 or 27,500 IU) by spinoculation for 2 hours at 1,200 x  
599 g. Cells were incubated for 48 hours at 37°C, then they were lysed and luciferase content  
600 quantified as relative light units (RLU), as previously described (71).

601

602           **Alternative coreceptor usage by SIVmac76XII in PBMCs.** Cryopreserved  
603 PBMC from two RMs (RM1 and RM2) were thawed in complete medium (RPMI 1640 with  
604 10% FBS, 1% L-glutamine and 1% penicillin/streptomycin) and stimulated for three days  
605 with 5 µg/ml Concanavalin A and 100 U/ml IL-2. Activated PBMCs were plated at  $2 \times 10^5$   
606 per well in 96-well plates, pretreated for one hour with 15 µM MVC (NIH AIDS Reagent  
607 Program) or with vehicle alone (DMSO), and then infected with SIVmac766XII (550 IU)  
608 by spinoculation for 1.5 hours at 1,200 g. Cells were then washed, incubated at 37°C,  
609 and supernatants were collected and 50% media replaced every 3-4 days. Replication  
610 was measured by SIV p27 Gag antigen production in the supernatant by ELISA (Perkin-  
611 Elmer).

612

613           **Assessment of the T/F virus variants.** The number of T/F variants was  
614 determined using a real-time single genome amplification (RT-SGA) approach described  
615 previously (32). Briefly, a 300 bp portion of the integrase gene surrounding the mutated  
616 site was amplified and sequenced using a limiting dilution PCR where only a single  
617 genome is amplified (SGA) per reaction. Viral RNA was extracted using the QIAamp Viral  
618 RNA Mini Kit (Qiagen) and then reverse transcribed into cDNA using SuperScript III  
619 reverse transcription according to manufacturer's recommendations (Invitrogen) and the  
620 antisense primer SIVmacIntR1 5'-AAG CAA GGG AAA TAA GTG CTA TGC AGT AA-3'.  
621 PCR was then performed with 1 × PCR buffer, 2 mM MgCl<sub>2</sub>, 0.2 mM of each  
622 deoxynucleoside triphosphate, 0.2 µM of each primer, and 0.025 U/µl Platinum Taq  
623 polymerase (Invitrogen) in a 10-µl reaction with sense primer SIVmacIntF1 5'-GAA GGG  
624 GAG GAA TAG GGG ATA TG-3' and antisense primer SIVmacIntR3 5'-CAC CTC TCT

625 AGC CTC TCC GGT ATC C-3' under the following conditions: 1 cycle of 94°C for 2 min,  
626 40 cycles at 94°C for 15 sec, 55°C for 30 sec, 60°C 1.5 min, and 72°C for 30 sec.  
627 Template positive reactions were determined by real-time PCR using as gene specific  
628 probe SIVIntP 5'-TCC CTA CCT TTA AGA TGA CTG CTC CTT CCC CT-3' with FAM6  
629 and ZEN/Iowa Black Hole Quencher (Integrated DNA Technologies) and directly  
630 sequenced with SIVmacIntR3 using BigDye Terminator technology (Life Technologies).  
631 To confirm PCR amplification from a single template, chromatograms were manually  
632 examined for multiple peaks, indicative of the presence of amplicons resulting from PCR-  
633 generated recombination events, Taq polymerase errors or multiple variant templates.

634

635 **Flow cytometry.** Flow cytometry was used to assess changes in CD4<sup>+</sup> and CD8<sup>+</sup>  
636 T cell populations, the frequency of CD4<sup>+</sup> and CD8<sup>+</sup> cells expressing CCR5, as well as  
637 their proliferation and immune activation status, as described (88-90). Briefly, 2 x 10<sup>6</sup> cells  
638 were stained with viability dye (Blue dye, Life Technologies) and incubated for 15 min in  
639 the dark at RT. The cells were then washed with PBS and stained for 30 min at RT in the  
640 dark with combinations of antibodies and combinations of isotype and fluorescence-  
641 minus-one controls (Table 1) appropriate for the identification of different T cell  
642 populations (Figure 111). Stained cells were washed in 1x PBS, fixed with 2%  
643 paraformaldehyde solution (PFA) and stored at 4° C prior to acquisition. For intracellular  
644 staining, viable cells stained as described above were washed with 1x PBS,  
645 permeabilized with a solution containing 0.1% of saponine and incubated for 30 min at  
646 room temperature in the dark. Cells were then stained with an anti-Ki-67 antibody (Table  
647 1). Cells were then washed with 1x PBS, fixed with 2% PFA and stored at 4° C prior to

648 the acquisition. A minimum of 250,000 CD3 live cells were acquired with FACSDiva  
649 software v.8.0. Acquired cells were analyzed using FlowJo 7.6.5 software.

650

651 **Statistical analyses.** All statistical analyses were performed with GraphPad Prism  
652 Software v.6.02 (GraphPad Software Inc. San Diego CA, USA). Data were expressed as  
653 averages  $\pm$  standard error of means (SEM). Unpaired nonparametric Mann-Whitney t test  
654 was used for significant differences between the experimental groups, with regards to the  
655 absolute cell counts and frequency of cells expressing CCR5, immune activation and cell  
656 proliferation markers. Wilcoxon paired non-parametric test was used, to determine  
657 significant differences between the baselines of mean cell frequencies and absolute  
658 counts and single time point of MVC treatment, for each experimental group. Chi-square  
659 test was used to establish significant differences between the animals that became  
660 infected in both groups. Differences were considered statistically significant at  $p \leq 0.05$ .

661

## 662 **Author contribution**

663 EBC, CA and IP designed experiments; EBC, CA, IP, ADK, RGC, BFK analyzed  
664 data, BFK and KM provided virus stock and sequence analysis; EBC, CX, KSW, MLC,  
665 BBP, KDR, TD, GSHR, DM, and KM performed experiments; EBC, CA, IP BFK, MLC,  
666 ADK, KSW, and RGC wrote the manuscript.

667

## 668 **Acknowledgements**

669 We would like to thank Drs. Guido Silvestri and Isaac Rodriguez-Chavez for  
670 helpful discussion. This work was supported by grant R56 DE023508 (CA) from the  
671 National Institute of Dental and Craniofacial Research (NIDCR). Parts of this study were  
672 supported with funds from grants: RO1 HL117715 (IP), R01 AI119346 (CA) and R01  
673 HL123096 (IP). KDR and BBP were supported by T32 AI065380 (Pitt AIDS Research  
674 Training, PART). BBP was supported by RO1 AI104373. This work was also partially  
675 supported by the UNC Center for AIDS Research (CFAR) (P30 AI50410). Finally, this  
676 project has been funded in part with Federal funds from the National Cancer Institute,  
677 National Institutes of Health, under Contract No. HHSN261200800001E. The funders  
678 had no role in study design, data collection and analysis, decision to publish, or  
679 preparation of the manuscript. The content of this publication does not necessarily  
680 reflect the views or policies of the Department of Health and Human Services, nor does  
681 mention of trade names, commercial products, or organizations imply endorsement by  
682 the U.S. Government.

683

## 684 **References**

- 685 1. **UNAIDS.** 2013. Progress report on the global plan.  
686 [http://www.unaids.org/sites/default/files/media\\_asset/20130625\\_progress\\_global](http://www.unaids.org/sites/default/files/media_asset/20130625_progress_global_plan_en_0.pdf)  
687 [\\_plan\\_en\\_0.pdf.](http://www.unaids.org/sites/default/files/media_asset/20130625_progress_global_plan_en_0.pdf)
- 688 2. **Bryson YJ, Luzuriaga K, Sullivan JL, Wara DW.** 1992. Proposed definitions for  
689 in utero versus intrapartum transmission of HIV-1. *N Engl J Med* **327**:1246-1247.

- 690 3. **Kuhn L, Abrams EJ, Chinchilla M, Tsai WY, Thea DM.** 1996. Sensitivity of HIV-  
691 1 DNA polymerase chain reaction in the neonatal period. . *AIDS* **10**:1181-1182.
- 692 4. **John GC, Nduati RW, Mbori-Ngacha DA, Richardson BA, Panteleeff D,**  
693 **Mwatha A, Overbaugh J, Bwayo J, Ndinya-Achola JO, Kreiss JK.** 2001.  
694 Correlates of mother-to-child human immunodeficiency virus type 1 (HIV-1)  
695 transmission: association with maternal plasma HIV-1 RNA load, genital HIV-1  
696 DNA shedding, and breast infections. *J Infect Dis* **183**:206-212.
- 697 5. **Kourtis AP, Butera S, Ibegbu C, Belec L, Duerr A.** 2003. Breast milk and HIV-  
698 1: vector of transmission or vehicle of protection? *Lancet Infect Dis* **3**:786-793.
- 699 6. **Miotti PG, Taha TE, Kumwenda NI, Broadhead R, Mtimavalye LA, Van der**  
700 **Hoeven L, Chipangwi JD, Liomba G, Biggar RJ.** 1999. HIV transmission  
701 through breastfeeding: a study in Malawi. *JAMA* **282**:744-749.
- 702 7. **Li Q, Zeng M, Duan L, Voss JE, Smith AJ, Pambuccian S, Shang L, Wietgreffe**  
703 **S, Southern PJ, Reilly CS, Skinner PJ, Zupancic ML, Carlis JV, Piatak M, Jr.,**  
704 **Waterman D, Reeves RK, Masek-Hammerman K, Derdeyn CA, Alpert MD,**  
705 **Evans DT, Kohler H, Muller S, Robinson J, Lifson JD, Burton DR, Johnson**  
706 **RP, Haase AT.** 2014. Live simian immunodeficiency virus vaccine correlate of  
707 protection: local antibody production and concentration on the path of virus entry.  
708 *J Immunol* **193**:3113-3125.
- 709 8. **Fowler MG, Qin M, Fiscus SA, Currier JS, Flynn PM, Chipato T, McIntyre J,**  
710 **Gnanashanmugam D, Siberry GK, Coletti AS, Taha TE, Klingman KL,**  
711 **Martinson FE, Owor M, Violari A, Moodley D, Theron GB, Bhosale R, Bobat**  
712 **R, Chi BH, Strehlau R, Mlay P, Loftis AJ, Browning R, Fenton T, Purdue L,**  
713 **Basar M, Shapiro DE, Mofenson LM, Team IBFPS.** 2016. Benefits and Risks of  
714 Antiretroviral Therapy for Perinatal HIV Prevention. *N Engl J Med* **375**:1726-1737.
- 715 9. **Coll O, Hernandez M, Boucher CA, Fortuny C, de Tejada BM, Canet Y, Caragol**  
716 **I, Tijnagel J, Bertran JM, Espanol T.** 1997. Vertical HIV-1 transmission correlates



- 717 with a high maternal viral load at delivery. *J Acquir Immune Defic Syndr Hum*  
718 *Retrovirol* **14**:26-30.
- 719 10. **Kumar SB, Rice CE, Milner DA, Jr., Ramirez NC, Ackerman WEt, Mwapasa V,**  
720 **Turner AN, Kwiek JJ.** 2012. Elevated cytokine and chemokine levels in the  
721 placenta are associated with in-utero HIV-1 mother-to-child transmission. *AIDS*  
722 **26**:685-694.
- 723 11. **St Louis ME, Kamenga M, Brown C, Nelson AM, Manzila T, Batter V, Behets**  
724 **F, Kabagabo U, Ryder RW, Oxtoby M, et al.** 1993. Risk for perinatal HIV-1  
725 transmission according to maternal immunologic, virologic, and placental factors.  
726 *JAMA* **269**:2853-2859.
- 727 12. **Lohman-Payne B, Slyker JA, Moore S, Maleche-Obimbo E, Wamalwa DC,**  
728 **Richardson BA, Rowland-Jones S, Mbori-Ngacha D, Farquhar C, Overbaugh**  
729 **J, John-Stewart G.** 2012. Breast milk cellular HIV-specific interferon gamma  
730 responses are associated with protection from peripartum HIV transmission. *AIDS*  
731 **26**:2007-2016.
- 732 13. **Pollara J, McGuire E, Fouda GG, Rountree W, Eudailey J, Overman RG,**  
733 **Seaton KE, Deal A, Edwards RW, Tegha G, Kamwendo D, Kumwenda J,**  
734 **Nelson JA, Liao HX, Brinkley C, Denny TN, Ochsenbauer C, Ellington S, King**  
735 **CC, Jamieson DJ, van der Horst C, Kourtis AP, Tomaras GD, Ferrari G,**  
736 **Permar SR.** 2015. Association of HIV-1 envelope-specific breast milk IgA  
737 responses with reduced risk of postnatal mother-to-child transmission of HIV-1. *J*  
738 *Virol* **89**:9952-9961.
- 739 14. **Wahl A, Swanson MD, Nochi T, Olesen R, Denton PW, Chateau M, Garcia JV.**  
740 2012. Human breast milk and antiretrovirals dramatically reduce oral HIV-1  
741 transmission in BLT humanized mice. *PLoS Pathog* **8**:e1002732.
- 742 15. **Walter J, Ghosh MK, Kuhn L, Semrau K, Sinkala M, Kankasa C, Thea DM,**  
743 **Aldrovandi GM.** 2009. High concentrations of interleukin 15 in breast milk are

- 744 associated with protection against postnatal HIV transmission. *J Infect Dis*  
745 **200**:1498-1502.
- 746 16. **Amedee AM, Rychert J, Lacour N, Fresh L, Ratterree M.** 2004. Viral and  
747 immunological factors associated with breast milk transmission of SIV in rhesus  
748 macaques. *Retrovirology* **1**:17.
- 749 17. **Dunn DT, Newell ML, Ades AE, Peckham CS.** 1992. Risk of human  
750 immunodeficiency virus type 1 transmission through breastfeeding. *Lancet*  
751 **340**:585-588.
- 752 18. **Garcia PM, Kalish LA, Pitt J, Minkoff H, Quinn TC, Burchett SK, Kornegay J,**  
753 **Jackson B, Moye J, Hanson C, Zorrilla C, Lew JF.** 1999. Maternal levels of  
754 plasma human immunodeficiency virus type 1 RNA and the risk of perinatal  
755 transmission. *N Engl J Med* **341**:394-402.
- 756 19. **Aldrovandi GM, Kuhn L.** 2010. What infants and breasts can teach us about  
757 natural protection from HIV infection. *J Infect Dis* **202 Suppl 3**:S366-370.
- 758 20. **Kuhn L, Sinkala M, Semrau K, Kankasa C, Kasonde P, Mwiya M, Hu CC, Tsai**  
759 **WY, Thea DM, Aldrovandi GM.** 2010. Elevations in mortality associated with  
760 weaning persist into the second year of life among uninfected children born to HIV-  
761 infected mothers. *Clin Infect Dis* **50**:437-444.
- 762 21. **Jayaraman P, Haigwood NL.** 2006. Animal models for perinatal transmission of  
763 HIV-1. *Front Biosci* **11**:2828-2844.
- 764 22. **Jayaraman P, Zhu T, Misher L, Mohan D, Kuller L, Polacino P, Richardson**  
765 **BA, Bielefeldt-Ohmann H, Anderson D, Hu SL, Haigwood NL.** 2007. Evidence  
766 for persistent, occult infection in neonatal macaques following perinatal  
767 transmission of simian-human immunodeficiency virus SF162P3. *J Virol* **81**:822-  
768 834.
- 769 23. **Chenine AL, Ferrantelli F, Hofmann-Lehmann R, Vangel MG, McClure HM,**  
770 **Ruprecht RM.** 2005. Older rhesus macaque infants are more susceptible to oral

- 771 infection with simian-human immunodeficiency virus 89.6P than neonates. *J Virol*  
772 **79**:1333-1336.
- 773 24. **Pandrea I, Onanga R, Souquiere S, Mouinga-Ondeme A, Bourry O, Makuwa**  
774 **M, Rouquet P, Silvestri G, Simon F, Roques P, Apetrei C.** 2008. Paucity of  
775 CD4+ CCR5+ T cells may prevent transmission of simian immunodeficiency virus  
776 in natural nonhuman primate hosts by breast-feeding. *J Virol* **82**:5501-5509.
- 777 25. **Ma D, Jasinska A, Kristoff J, Grobler JP, Turner T, Jung Y, Schmitt C, Raehtz**  
778 **K, Feyertag F, Martinez Sosa N, Wijewardana V, Burke DS, Robertson DL,**  
779 **Tracy R, Pandrea I, Freimer N, Apetrei C, International Vervet Research C.**  
780 2013. SIVagm infection in wild African green monkeys from South Africa:  
781 epidemiology, natural history, and evolutionary considerations. *PLoS Pathog*  
782 **9**:e1003011.
- 783 26. **Ma D, Jasinska AJ, Feyertag F, Wijewardana V, Kristoff J, He T, Raehtz K,**  
784 **Schmitt CA, Jung Y, Cramer JD, Dione M, Antonio M, Tracy R, Turner T,**  
785 **Robertson DL, Pandrea I, Freimer N, Apetrei C, International Vervet Research**  
786 **C.** 2014. Factors associated with simian immunodeficiency virus transmission in a  
787 natural African nonhuman primate host in the wild. *J Virol* **88**:5687-5705.
- 788 27. **Ciaranello AL, Perez F, Keatinge J, Park JE, Engelsmann B, Maruva M,**  
789 **Walensky RP, Dabis F, Chu J, Rusibamayila A, Mushavi A, Freedberg KA.**  
790 2012. What will it take to eliminate pediatric HIV? Reaching WHO target rates of  
791 mother-to-child HIV transmission in Zimbabwe: a model-based analysis. *PLoS*  
792 *Med* **9**:e1001156.
- 793 28. **Pandrea I, Parrish NF, Raehtz K, Gaufin T, Barbian HJ, Ma D, Kristoff J,**  
794 **Gautam R, Zhong F, Haret-Richter GS, Trichel A, Shaw GM, Hahn BH, Apetrei**  
795 **C.** 2012. Mucosal simian immunodeficiency virus transmission in African green  
796 monkeys: susceptibility to infection is proportional to target cell availability at  
797 mucosal sites. *J Virol* **86**:4158-4168.

- 798 29. **Raetz K, Pandrea I, Apetrei C.** 2016. The well-tempered SIV infection:  
799 Pathogenesis of SIV infection in natural hosts in the wild, with emphasis on virus  
800 transmission and early events post-infection that may contribute to protection from  
801 disease progression. *Infect Genet Evol* **46**:308-323.
- 802 30. **Veazey RS, Ketas TJ, Dufour J, Moroney-Rasmussen T, Green LC, Klasse PJ,**  
803 **Moore JP.** 2010. Protection of rhesus macaques from vaginal infection by  
804 vaginally delivered maraviroc, an inhibitor of HIV-1 entry via the CCR5 co-receptor.  
805 *J Infect Dis* **202**:739-744.
- 806 31. **Wasmuth JC, Rockstroh JK, Hardy WD.** 2012. Drug safety evaluation of  
807 maraviroc for the treatment of HIV infection. *Expert Opin Drug Saf* **11**:161-174.
- 808 32. **Del Prete GQ, Park H, Fennessey CM, Reid C, Lipkey L, Newman L, Oswald**  
809 **K, Kahl C, Piatak M, Jr., Quinones OA, Alvord WG, Smedley J, Estes JD,**  
810 **Lifson JD, Picker LJ, Keele BF.** 2014. Molecularly tagged simian  
811 immunodeficiency virus SIVmac239 synthetic swarm for tracking independent  
812 infection events. *J Virol* **88**:8077-8090.
- 813 33. **Rosario MC, Jacqmin P, Dorr P, James I, Jenkins TM, Abel S, van der Ryst E.**  
814 2008. Population pharmacokinetic/pharmacodynamic analysis of CCR5 receptor  
815 occupancy by maraviroc in healthy subjects and HIV-positive patients. *Br J Clin*  
816 *Pharmacol* **65 Suppl 1**:86-94.
- 817 34. **Brown KC, Patterson KB, Malone SA, Shaheen NJ, Prince HM, Dumond JB,**  
818 **Spacek MB, Heidt PE, Cohen MS, Kashuba AD.** 2011. Single and multiple dose  
819 pharmacokinetics of maraviroc in saliva, semen, and rectal tissue of healthy HIV-  
820 negative men. *J Infect Dis* **203**:1484-1490.
- 821 35. **Dumond JB, Patterson KB, Pecha AL, Werner RE, Andrews E, Damle B,**  
822 **Tressler R, Worsley J, Kashuba AD.** 2009. Maraviroc concentrates in the  
823 cervicovaginal fluid and vaginal tissue of HIV-negative women. *J Acquir Immune*  
824 *Defic Syndr* **51**:546-553.

- 825 36. **FDA.** 2001. Guidance for industry: bioanalytical method validation  
826 <http://www.fda.gov/downloads/Drugs/GuidanceComplianceRegulatoryInformation>  
827 [/Guidances/UCM070107.pdf](http://www.fda.gov/downloads/Drugs/GuidanceComplianceRegulatoryInformation/Guidances/UCM070107.pdf). Accessed
- 828 37. **Massud I, Aung W, Martin A, Bachman S, Mitchell J, Aubert R, Solomon**  
829 **Tsegaye T, Kersh E, Pau CP, Heneine W, Garcia-Lerma JG.** 2013. Lack of  
830 prophylactic efficacy of oral maraviroc in macaques despite high drug  
831 concentrations in rectal tissues. *J Virol* **87**:8952-8961.
- 832 38. **Lopker MJ, Del Prete GQ, Estes JD, Li H, Reid C, Newman L, Lipkey L, Camus**  
833 **C, Easlick JL, Wang S, Decker JM, Bar KJ, Learn G, Pal R, Weiss DE, Hahn**  
834 **BH, Lifson JD, Shaw GM, Keele BF.** 2016. Derivation and Characterization of  
835 Pathogenic Transmitted/Founder Molecular Clones from Simian  
836 Immunodeficiency Virus SIVsmE660 and SIVmac251 following Mucosal Infection.  
837 *J Virol* **90**:8435-8453.
- 838 39. **Pohlmann S, Lee B, Meister S, Krumbiegel M, Leslie G, Doms RW, Kirchhoff**  
839 **F.** 2000. Simian immunodeficiency virus utilizes human and sooty mangabey but  
840 not rhesus macaque STRL33 for efficient entry. *J Virol* **74**:5075-5082.
- 841 40. **Elliott ST, Wetzel KS, Francella N, Bryan S, Romero DC, Riddick NE, Shaheen**  
842 **F, Vanderford T, Derdeyn CA, Silvestri G, Paiardini M, Collman RG.** 2015.  
843 Dualtropic CXCR6/CCR5 simian immunodeficiency virus (SIV) infection of sooty  
844 mangabey primary lymphocytes: Distinct coreceptor use in natural versus  
845 pathogenic hosts of SIV. *J Virol* **89**:9252-9261.
- 846 41. **Kiene M, Marzi A, Urbanczyk A, Bertram S, Fisch T, Nehlmeier I, Gnirss K,**  
847 **Karsten CB, Palesch D, Munch J, Chiodi F, Pohlmann S, Steffen I.** 2012. The  
848 role of the alternative coreceptor GPR15 in SIV tropism for human cells. *Virology*  
849 **433**:73-84.
- 850 42. **Puertas MC, Massanella M, Llibre JM, Ballesteros M, Buzon MJ, Ouchi D,**  
851 **Esteve A, Boix J, Manzardo C, Miro JM, Gatell JM, Clotet B, Blanco J,**

- 852 **Martinez-Picado J, MaraviBoost Collaborative G.** 2014. Intensification of a  
853 raltegravir-based regimen with maraviroc in early HIV-1 infection. *AIDS* **28**:325-  
854 334.
- 855 43. **Mencarelli A, Cipriani S, Francisci D, Santucci L, Baldelli F, Distrutti E,**  
856 **Fiorucci S.** 2016. Highly specific blockade of CCR5 inhibits leukocyte trafficking  
857 and reduces mucosal inflammation in murine colitis. *Sci Rep* **6**:30802.
- 858 44. **Martin MP, Dean M, Smith MW, Winkler C, Gerrard B, Michael NL, Lee B,**  
859 **Doms RW, Margolick J, Buchbinder S, Goedert JJ, O'Brien TR, Hilgartner**  
860 **MW, Vlahov D, O'Brien SJ, Carrington M.** 1998. Genetic acceleration of AIDS  
861 progression by a promoter variant of CCR5. *Science* **282**:1907-1911.
- 862 45. **Trkola A, Dragic T, Arthos J, Binley JM, Olson WC, Allaway GP, Cheng-Mayer**  
863 **C, Robinson J, Maddon PJ, Moore JP.** 1996. CD4-dependent, antibody-sensitive  
864 interactions between HIV-1 and its co-receptor CCR-5. *Nature* **384**:184-187.
- 865 46. **Reynes J, Portales P, Segondy M, Baillat V, Andre P, Reant B, Avinens O,**  
866 **Couderc G, Benkirane M, Clot J, Eliaou JF, Corbeau P.** 2000. CD4+ T cell  
867 surface CCR5 density as a determining factor of virus load in persons infected with  
868 human immunodeficiency virus type 1. *J Infect Dis* **181**:927-932.
- 869 47. **Heredia A, Gilliam B, DeVico A, Le N, Bamba D, Flinko R, Lewis G, Gallo RC,**  
870 **Redfield RR.** 2007. CCR5 density levels on primary CD4 T cells impact the  
871 replication and Enfuvirtide susceptibility of R5 HIV-1. *AIDS* **21**:1317-1322.
- 872 48. **Wilkin TJ, Lalama CM, McKinnon J, Gandhi RT, Lin N, Landay A, Ribaud H,**  
873 **Fox L, Currier JS, Mellors JW, Gulick R, Tenorio AR.** 2012. A pilot trial of adding  
874 maraviroc to suppressive antiretroviral therapy for suboptimal CD4+ T-cell  
875 recovery despite sustained virologic suppression: ACTG A5256. *J Infect Dis*  
876 **206**:534-542.
- 877 49. **Hunt PW, Shulman NS, Hayes TL, Dahl V, Somsouk M, Funderburg NT,**  
878 **McLaughlin B, Landay AL, Adeyemi O, Gilman LE, Clagett B, Rodriguez B,**

- 879 **Martin JN, Schacker TW, Shacklett BL, Palmer S, Lederman MM, Deeks SG.**  
880 2013. The immunologic effects of maraviroc intensification in treated HIV-infected  
881 individuals with incomplete CD4+ T-cell recovery: a randomized trial. *Blood*  
882 **121**:4635-4646.
- 883 50. **De Cock KM, Fowler MG, Mercier E, de Vincenzi I, Saba J, Hoff E, Alnwick DJ,**  
884 **Rogers M, Shaffer N.** 2000. Prevention of mother-to-child HIV transmission in  
885 resource-poor countries: translating research into policy and practice. *JAMA*  
886 **283**:1175-1182.
- 887 51. **Rollins N, Meda N, Becquet R, Coutoudis A, Humphrey J, Jeffrey B,**  
888 **Kanshana S, Kuhn L, Leroy V, Mbori-Ngacha D, McIntyre J, Newell ML.** 2004.  
889 Preventing postnatal transmission of HIV-1 through breast-feeding: modifying  
890 infant feeding practices. *J Acquir Immune Defic Syndr* **35**:188-195.
- 891 52. **Nduati R, John G, Mbori-Ngacha D, Richardson B, Overbaugh J, Mwatha A,**  
892 **Ndinya-Achola J, Bwayo J, Onyango FE, Hughes J, Kreiss J.** 2000. Effect of  
893 breastfeeding and formula feeding on transmission of HIV-1: a randomized clinical  
894 trial. *JAMA* **283**:1167-1174.
- 895 53. **Kuhn L, Aldrovandi G.** 2010. Survival and health benefits of breastfeeding versus  
896 artificial feeding in infants of HIV-infected women: developing versus developed  
897 world. *Clin Perinatol* **37**:843-862.
- 898 54. **Taha TE, Kumwenda J, Cole SR, Hoover DR, Kafulafula G, Fowler MG,**  
899 **Thigpen MC, Li Q, Kumwenda NI, Mofenson L.** 2009. Postnatal HIV-1  
900 transmission after cessation of infant extended antiretroviral prophylaxis and effect  
901 of maternal highly active antiretroviral therapy. *J Infect Dis* **200**:1490-1497.
- 902 55. **Nagelkerke NJ, Moses S, Embree JE, Jenniskens F, Plummer FA.** 1995. The  
903 duration of breastfeeding by HIV-1-infected mothers in developing countries:  
904 balancing benefits and risks. *J Acquir Immune Defic Syndr Hum Retrovirol* **8**:176-  
905 181.

- 906 56. **Chahroudi A, Meeker T, Lawson B, Ratcliffe S, Else J, Silvestri G.** 2011.  
907 Mother-to-infant transmission of simian immunodeficiency virus is rare in sooty  
908 mangabeys and is associated with low viremia. *J Virol* **85**:5757-5763.
- 909 57. **Wilks AB, Perry JR, Ehlinger EP, Zahn RC, White R, Gauduin MC, Carville A,**  
910 **Seaman MS, Schmitz JE, Permar SR.** 2011. High cell-free virus load and robust  
911 autologous humoral immune responses in breast milk of simian immunodeficiency  
912 virus-infected african green monkeys. *J Virol* **85**:9517-9526.
- 913 58. **Clapham PR, McKnight A.** 2001. HIV-1 receptors and cell tropism. *Br Med Bull*  
914 **58**:43-59.
- 915 59. **Veazey RS, Tham IC, Mansfield KG, DeMaria M, Forand AE, Shvetz DE,**  
916 **Chalifoux LV, Sehgal PK, Lackner AA.** 2000. Identifying the target cell in primary  
917 simian immunodeficiency virus (SIV) infection: highly activated memory CD4(+) T  
918 cells are rapidly eliminated in early SIV infection in vivo. *J Virol* **74**:57-64.
- 919 60. **Parrish NF, Wilen CB, Banks LB, Iyer SS, Pfaff JM, Salazar-Gonzalez JF,**  
920 **Salazar MG, Decker JM, Parrish EH, Berg A, Hopper J, Hora B, Kumar A,**  
921 **Mahlokozera T, Yuan S, Coleman C, Vermeulen M, Ding H, Ochsenbauer C,**  
922 **Tilton JC, Permar SR, Kappes JC, Betts MR, Busch MP, Gao F, Montefiori D,**  
923 **Haynes BF, Shaw GM, Hahn BH, Doms RW.** 2012. Transmitted/founder and  
924 chronic subtype C HIV-1 use CD4 and CCR5 receptors with equal efficiency and  
925 are not inhibited by blocking the integrin alpha4beta7. *PLoS Pathog* **8**:e1002686.
- 926 61. **Burke BP, Boyd MP, Impey H, Breton LR, Bartlett JS, Symonds GP, Hutter G.**  
927 2014. CCR5 as a natural and modulated target for inhibition of HIV. *Viruses* **6**:54-  
928 68.
- 929 62. **MacArthur RD, Novak RM.** 2008. Reviews of anti-infective agents: maraviroc: the  
930 first of a new class of antiretroviral agents. *Clin Infect Dis* **47**:236-241.



- 931 63. **Latinovic O, Kuruppu J, Davis C, Le N, Heredia A.** 2009. Pharmacotherapy of  
932 HIV-1 Infection: Focus on CCR5 Antagonist Maraviroc. *Clin Med Ther* **1**:1497-  
933 1510.
- 934 64. **Kawana-Tachikawa A, Llibre JM, Bravo I, Escrig R, Mothe B, Puig J, Puertas  
935 MC, Martinez-Picado J, Blanco J, Manzardo C, Miro JM, Iwamoto A, Pozniak  
936 AL, Gatell JM, Clotet B, Brander C, Investigators M.** 2014. Effect of maraviroc  
937 intensification on HIV-1-specific T cell immunity in recently HIV-1-infected  
938 individuals. *PLoS One* **9**:e87334.
- 939 65. **Kelly KM, Beck SE, Metcalf Pate KA, Queen SE, Dorsey JL, Adams RJ, Avery  
940 LB, Hubbard W, Tarwater PM, Mankowski JL.** 2013. Neuroprotective maraviroc  
941 monotherapy in simian immunodeficiency virus-infected macaques: reduced  
942 replicating and latent SIV in the brain. *AIDS* **27**:F21-28.
- 943 66. **Funderburg N, Kalinowska M, Eason J, Goodrich J, Heera J, Mayer H, Rajcic  
944 N, Valdez H, Lederman MM.** 2010. Effects of maraviroc and efavirenz on markers  
945 of immune activation and inflammation and associations with CD4+ cell rises in  
946 HIV-infected patients. *PLoS One* **5**:e13188.
- 947 67. **Schroder C, Pierson RN, 3rd, Nguyen BN, Kawka DW, Peterson LB, Wu G,  
948 Zhang T, Springer MS, Siciliano SJ, Iliff S, Ayala JM, Lu M, Mudgett JS, Lyons  
949 K, Mills SG, Miller GG, Singer, II, Azimzadeh AM, DeMartino JA.** 2007. CCR5  
950 blockade modulates inflammation and alloimmunity in primates. *J Immunol*  
951 **179**:2289-2299.
- 952 68. **Walker DK, Abel S, Comby P, Muirhead GJ, Nedderman AN, Smith DA.** 2005.  
953 Species differences in the disposition of the CCR5 antagonist, UK-427,857, a new  
954 potential treatment for HIV. *Drug Metab Dispos* **33**:587-595.
- 955 69. **Fatkenheuer G, Pozniak AL, Johnson MA, Plettenberg A, Staszewski S,  
956 Hoepelman AI, Saag MS, Goebel FD, Rockstroh JK, Dezube BJ, Jenkins TM,  
957 Medhurst C, Sullivan JF, Ridgway C, Abel S, James IT, Youle M, van der Ryst**

- 958           **E.** 2005. Efficacy of short-term monotherapy with maraviroc, a new CCR5  
959 antagonist, in patients infected with HIV-1. *Nat Med* **11**:1170-1172.
- 960 70. **Farquhar C, John-Stewart G.** 2003. The role of infant immune responses and  
961 genetic factors in preventing HIV-1 acquisition and disease progression. *Clin Exp*  
962 *Immunol* **134**:367-377.
- 963 71. **Elliott ST, Riddick NE, Francella N, Paiardini M, Vanderford TH, Li B, Apetrei**  
964 **C, Sodora DL, Derdeyn CA, Silvestri G, Collman RG.** 2012. Cloning and  
965 analysis of sooty mangabey alternative coreceptors that support simian  
966 immunodeficiency virus SIVsmm entry independently of CCR5. *J Virol* **86**:898-908.
- 967 72. **Wetzel KS, Yi Y, Elliott ST, Romero D, Jacquelin B, Hahn BH, Muller-Trutwin**  
968 **M, Apetrei C, Pandrea I, Collman RG.** 2017. CXCR6-Mediated Simian  
969 Immunodeficiency Virus SIVagmSab Entry into Sabaeus African Green Monkey  
970 Lymphocytes Implicates Widespread Use of Non-CCR5 Pathways in Natural Host  
971 Infections. *J Virol* **91**.
- 972 73. **Riddick NE, Hermann EA, Loftin LM, Elliott ST, Wey WC, Cervasi B, Taaffe J,**  
973 **Engram JC, Li B, Else JG, Li Y, Hahn BH, Derdeyn CA, Sodora DL, Apetrei C,**  
974 **Paiardini M, Silvestri G, Collman RG.** 2010. A novel CCR5 mutation common in  
975 sooty mangabeys reveals SIVsmm infection of CCR5-null natural hosts and  
976 efficient alternative coreceptor use in vivo. *PLoS Pathog* **6**:e1001064.
- 977 74. **Wood LF, Chahroudi A, Chen HL, Jaspán HB, Sodora DL.** 2013. The oral  
978 mucosa immune environment and oral transmission of HIV/SIV. *Immunol Rev*  
979 **254**:34-53.
- 980 75. **Fennessey CM, Keele BF.** 2013. Using nonhuman primates to model HIV  
981 transmission. *Curr Opin HIV AIDS* **8**:280-287.
- 982 76. **Pohlmann S, Stolte N, Munch J, Ten Haaf P, Heeney JL, Stahl-Hennig C,**  
983 **Kirchhoff F.** 1999. Co-receptor usage of BOB/GPR15 in addition to CCR5 has no

- 984 significant effect on replication of simian immunodeficiency virus in vivo. *J Infect*  
985 *Dis* **180**:1494-1502.
- 986 77. **Gautam R, Carter AC, Katz N, Butler IF, Barnes M, Hasegawa A, Ratterree M,**  
987 **Silvestri G, Marx PA, Hirsch VM, Pandrea I, Apetrei C.** 2007. In vitro  
988 characterization of primary SIVsmm isolates belonging to different lineages. In vitro  
989 growth on rhesus macaque cells is not predictive for in vivo replication in rhesus  
990 macaques. *Virology* **362**:257-270.
- 991 78. **Zhang YJ, Zhang L, Ketas T, Korber BT, Moore JP.** 2001. HIV type 1 molecular  
992 clones able to use the Bonzo/STRL-33 coreceptor for virus entry. *AIDS Res Hum*  
993 *Retroviruses* **17**:217-227.
- 994 79. **Edinger AL, Hoffman TL, Sharron M, Lee B, O'Dowd B, Doms RW.** 1998. Use  
995 of GPR1, GPR15, and STRL33 as coreceptors by diverse human  
996 immunodeficiency virus type 1 and simian immunodeficiency virus envelope  
997 proteins. *Virology* **249**:367-378.
- 998 80. **Wetzel KS, Yi Y, Elliott ST, Romero D, Jacquelin B, Hahn BH, Muller-Trutwin**  
999 **M, Apetrei C, Pandrea I, Collman RG.** 2017. CXCR6-Mediated Simian  
1000 Immunodeficiency Virus SIVagmSab Entry into Sabaeus African Green Monkey  
1001 Lymphocytes Implicates Widespread Use of Non-CCR5 Pathways in Natural Host  
1002 Infections. *J Virol* **91(4)**: e01626-16.
- 1003 81. **Li H, Wang S, Kong R, Ding W, Lee FH, Parker Z, Kim E, Learn GH, Hahn P,**  
1004 **Policicchio B, Brocca-Cofano E, Deleage C, Hao X, Chuang GY, Gorman J,**  
1005 **Gardner M, Lewis MG, Hatzioannou T, Santra S, Apetrei C, Pandrea I, Alam**  
1006 **SM, Liao HX, Shen X, Tomaras GD, Farzan M, Chertova E, Keele BF, Estes**  
1007 **JD, Lifson JD, Doms RW, Montefiori DC, Haynes BF, Sodroski JG, Kwong**  
1008 **PD, Hahn BH, Shaw GM.** 2016. Envelope residue 375 substitutions in simian-  
1009 human immunodeficiency viruses enhance CD4 binding and replication in rhesus  
1010 macaques. *Proc Natl Acad Sci U S A* **113**:E3413-3422.

- 1011 82. **Del Prete GQ, Ailers B, Moldt B, Keele BF, Estes JD, Rodriguez A, Sampias**  
1012 **M, Oswald K, Fast R, Trubey CM, Chertova E, Smedley J, LaBranche CC,**  
1013 **Montefiori DC, Burton DR, Shaw GM, Markowitz M, Piatak M, Jr.,**  
1014 **KewalRamani VN, Bieniasz PD, Lifson JD, Hatzioannou T.** 2014. Selection of  
1015 unadapted, pathogenic SHIVs encoding newly transmitted HIV-1 envelope  
1016 proteins. *Cell Host Microbe* **16**:412-418.
- 1017 83. **Coll J, Molto J, Boix J, Gomez-Mora E, Else L, Garcia E, Paredes R, Ouchi D,**  
1018 **Carrillo A, Escrig R, Back D, Clotet B, Cabrera C.** 2015. Single oral dose of  
1019 maraviroc does not prevent ex-vivo HIV infection of rectal mucosa in HIV-1  
1020 negative human volunteers. *AIDS* **29**:2149-2154.
- 1021 84. **Zheng Y, Han GW, Abagyan R, Wu B, Stevens RC, Cherezov V, Kufareva I,**  
1022 **Handel TM.** 2017. Structure of CC Chemokine Receptor 5 with a Potent  
1023 Chemokine Antagonist Reveals Mechanisms of Chemokine Recognition and  
1024 Molecular Mimicry by HIV. *Immunity* **46**:1005-1017 e1005.
- 1025 85. **National Research Council (U.S.). Committee for the Update of the Guide for**  
1026 **the Care and Use of Laboratory Animals., Institute for Laboratory Animal**  
1027 **Research (U.S.), National Academies Press (U.S.).** 2011. Guide for the care and  
1028 use of laboratory animals, 8th ed. National Academies Press, Washington, D.C.
- 1029 86. **Winters MA, Van Rompay KK, Kashuba AD, Shulman NS, Holodniy M.** 2010.  
1030 Maternal-fetal pharmacokinetics and dynamics of a single intrapartum dose of  
1031 maraviroc in rhesus macaques. *Antimicrob Agents Chemother* **54**:4059-4063.
- 1032 87. **Pandrea IV, Gautam R, Ribeiro RM, Brenchley JM, Butler IF, Pattison M,**  
1033 **Rasmussen T, Marx PA, Silvestri G, Lackner AA, Perelson AS, Douek DC,**  
1034 **Veazey RS, Apetrei C.** 2007. Acute loss of intestinal CD4+ T cells is not predictive  
1035 of simian immunodeficiency virus virulence. *J Immunol* **179**:3035-3046.
- 1036 88. **Gautam R, Gaufin T, Butler I, Gautam A, Barnes M, Mandell D, Pattison M,**  
1037 **Tatum C, Macfarland J, Monjure C, Marx PA, Pandrea I, Apetrei C.** 2009.

- 1038 Simian immunodeficiency virus SIVrcm, a unique CCR2-tropic virus, selectively  
1039 depletes memory CD4<sup>+</sup> T cells in pigtailed macaques through expanded  
1040 coreceptor usage in vivo. *J Virol* **83**:7894-7908.
- 1041 89. **Mandell DT, Kristoff J, Gaufin T, Gautam R, Ma D, Sandler N, Haret-Richter**  
1042 **G, Xu C, Amer H, Dufour J, Trichel A, Douek DC, Keele BF, Apetrei C,**  
1043 **Pandrea I.** 2014. Pathogenic features associated with increased virulence upon  
1044 Simian immunodeficiency virus cross-species transmission from natural hosts. *J*  
1045 *Virol* **88**:6778-6792.
- 1046 90. **Pandrea I, Gaufin T, Gautam R, Kristoff J, Mandell D, Montefiori D, Keele BF,**  
1047 **Ribeiro RM, Veazey RS, Apetrei C.** 2011. Functional cure of SIVagm infection in  
1048 rhesus macaques results in complete recovery of CD4<sup>+</sup> T cells and is reverted by  
1049 CD8<sup>+</sup> cell depletion. *PLoS Pathog* **7**:e1002170.

1050

1051 **Figure Legends**

1052 **Figure 1. Alterations in the SIVmac766 clone that allow for discriminating the**  
1053 **number of unique T/F variants.** SIVmac766XII is an infection stock is composed of  
1054 eleven distinct viral clones differing from wild-type virus by 3 synonymous mutations  
1055 within the integrase gene (A). The entire remaining genome is identical between clones.  
1056 The proportion of each variant in the viral stock was determined by RT-SGA with 334  
1057 sequences examined (B). All mutations and the pie chart are color coded for each of the  
1058 twelve clones within the synthetic swarm.

1059  
1060 **Figure 2. Comparative assessment of MVC pharmacokinetics and plasma**  
1061 **VLs at the time of and after the SIVmac766XII challenge.** MVC concentrations in  
1062 plasma at 4 hours (maximum concentration) and 16 h (minimum concentration) after  
1063 systemic administration of 150 mg/kg of MVC; Plasma VLs are shown at the  
1064 corresponding time points of treatment and viral challenge for infant RMs in the MVC-  
1065 treated group and untreated controls. Closed symbols represent MVC concentration,  
1066 open symbols illustrate the viral loads. MVC is expressed as ng/mL of plasma, the viral  
1067 load is expressed as logarithms of the numbers of viral RNA copies per ml of plasma.  
1068 Gray dotted line show the lower limit of quantification (LLOQ, 5 ng/ml) of the bioanalytical  
1069 LC-MS/MS method; short dashed line shows the limit of viral load quantification (LOQ, 30  
1070 copies per ml). Violet arrows illustrate the virus challenge.

1071  
1072 **Figure 3. Pharmacokinetic analysis of MVC concentration in plasma and**  
1073 **tissues in two infant RM from the MVC-treated control group.** (a) MVC concentrations  
1074 in plasma at 4 hours (maximum concentration) and 16 h (minimum concentration) after  
1075 systemic administration of 150 mg/kg of MVC; MVC concentration is expressed as ng/mL

1076 of plasma. (b) MVC concentrations in LNs, tonsils and intestine at 4 hours and 16 h after  
1077 systemic administration; MVC concentration is expressed as ng/g tissue. Red circles  
1078 represent RM1, blue squares represent RM2. Black dotted line show the lower limit of  
1079 quantification (LLOQ, 5 ng/ml) of the bioanalytical LC-MS/MS method

1080 **Figure 4. CCR5 receptor occupancy on CD4<sup>+</sup> and CD8<sup>+</sup> T cells from blood,**  
1081 **lymph nodes, tonsils and intestine from two infant RMs.** Percentage of CCR5  
1082 receptor occupancy on circulating CD4<sup>+</sup> T cells (a) and CD8<sup>+</sup> T cells (b) from infant RMs  
1083 included in the study group at the time of SIVmac challenge. White open squares  
1084 represent untreated infant RMs from the control group, red circles represents MVC-  
1085 treated infant RMs and green triangle represent MVC-treated uninfected infant RMs. Data  
1086 are presented as individual values with the group means (long solid lines) and standard  
1087 errors of the means (short solid lines). Mann-Whitney test was used to calculate the exact  
1088 p value. (c-f) Coreceptor occupancy in blood and tissues of the infant RMs from the MVC-  
1089 treated control group. Percentage of receptor occupancy on CD4<sup>+</sup> and (e) CD8<sup>+</sup> T cells 4  
1090 h after the MVC administration (maximum concentration). (d) Percentage of receptor  
1091 occupancy on CD4<sup>+</sup> and (f) CD8<sup>+</sup> T cells 16 h after MVC administration (maximum  
1092 concentration). Red circles represent infant RM1, blue squares represent infant RM2.

1093  
1094 **Figure 5. Correlation between the levels of CCR5 expression on the**  
1095 **peripheral CD4<sup>+</sup> T cells and the number of viral challenges required for infecting**  
1096 **MVC-treated and untreated RMs.** The two MVC-treated, SIV uninfected RMs are  
1097 illustrated as open circles.

1098  
1099 **Figure 6. SIVmac766XII use of RM coreceptors.** (A) CF2th-Luc cells that contain  
1100 a Tat-driven luciferase reporter were transfected with expression plasmids containing RM

1101 CD4 and coreceptor. Cells were infected 48 hours later with SIVmac766XII (2750IU,  
1102 13750IU and 27500IU) and entry was quantified 72 hours later by measuring luciferase  
1103 production as relative light units (RLU). Infections were carried out in triplicate and bars  
1104 represent means and standard error of the mean (sme) values. Sooty mangabey CXCR6,  
1105 which is a functional coreceptor, was included at the highest inoculum for comparison  
1106 (SM CXCR6) black bar. (B) SIVmac766XII infectivity on PBMCs. PBMC from two RM  
1107 were stimulated for three days with ConA and IL-2, then pretreated for one hour with  
1108 maraviroc (MVC; 15  $\mu$ M) or with vehicle alone (No Drug), and infected with SIVmac766XII  
1109 (550IU). (C) SIVmac766XII infectivity on PBMCs. Infections were carried out in duplicate,  
1110 and infection was measured by p27 production in the supernatant. Each line indicates  
1111 one infection condition per animal, and data represents the mean and standard error of  
1112 the mean values.

1113

1114 **Figure 7. Changes in the viral loads of the SIVmac-infected RMs treated with**  
1115 **MVC compared with untreated controls.** Plasma vRNA loads (copies/ml, expressed in  
1116 logarithmic format) in MVC-treated and untreated group. Data are geometrical means,  
1117 with the bars representing standard error of the mean. MVC-treated infant RMs are  
1118 representing as red circles; infant RM controls are showed as open black squares. Mann-  
1119 Whitney test was used to calculate the exact p value ( $p= 0.05$ ).

1120

1121 **Figure 8. Longitudinal analysis of absolute CD4<sup>+</sup> and CD8<sup>+</sup> T cell counts in**  
1122 **blood from the SIV-infected infant RMs.** (A) Changes in the CD4<sup>+</sup> T cells; (B) Changes  
1123 in the CD8<sup>+</sup> T cells; Left panels illustrate individual animals; right panels averages. Red  
1124 symbols illustrate MVC-treated animals. Open black symbols illustrated untreated  
1125 controls. Vertical bars in the right panels are the standard errors of the means.



1126

1127 **Figure 9. Longitudinal analysis of absolute counts of CD4<sup>+</sup> and CD8<sup>+</sup> T cells**  
1128 **expressing CCR5 in blood from the SIV-infected infant RMs.** (A,B) Changes in the  
1129 CCR5<sup>+</sup> CD4<sup>+</sup> T cells; (C,D) Changes in the CCR5<sup>+</sup> CD8<sup>+</sup> T cells; Left panels illustrate  
1130 individual animals; right panels averages. Red symbols illustrate MVC-treated animals.  
1131 Open black symbols illustrated untreated controls. Vertical bars in the right panels are the  
1132 standard errors of the means.

1133

1134 **Figure 10. Changes in the frequency of CD4<sup>+</sup> and CD8<sup>+</sup> T cells expressing**  
1135 **proliferation and immune activation markers in blood from the SIV-infected infant**  
1136 **RMs.** (A) frequency of the CD4<sup>+</sup> T cells expressing proliferation marker Ki-67; (B)  
1137 frequency of the CD8<sup>+</sup> T cells expressing proliferation marker Ki-67; (C) frequency of the  
1138 CD4<sup>+</sup> T cells expressing immune activation markers CD38 and HLA-DR; (D) frequency of  
1139 the CD8<sup>+</sup> T cells expressing immune activation markers CD38 and HLA-DR. Left panels  
1140 illustrate individual animals; right panels averages. Red symbols illustrate MVC-treated  
1141 animals. Open black symbols illustrated untreated controls. Vertical bars in the right  
1142 panels are the standard errors of the means. Mann-Whitney test was used to calculate  
1143 the exact p value.

1144

1145 **Figure 11. Gating strategy employed to characterize the CD4<sup>+</sup> and CD8<sup>+</sup> T**  
1146 **cells and their levels of expression for CCR5, as well as the frequency of activated**  
1147 **and proliferating T cells (Illustrative plots from RM34).** (a-d) CD4<sup>+</sup> and CD8<sup>+</sup> T cells  
1148 were gated on singlets followed by lymphocytes and CD3<sup>+</sup>; (e) CD4<sup>+</sup> and (i) CD8<sup>+</sup> T cells  
1149 expressing CCR5; (f) CD4<sup>+</sup> and (j) CD8<sup>+</sup> T-cell naïve and memory subsets; (g) CD4<sup>+</sup> and  
1150 (k) CD8<sup>+</sup> T cells expressing Ki-67; (h) activated CD4<sup>+</sup> and (l) CD8<sup>+</sup> T cells expressing

1151 CD38 and HLA-DR. FSC-A: forward scatter area; FSC-H: forward scatter height; SSC-A:  
1152 side scatter area.  
1153

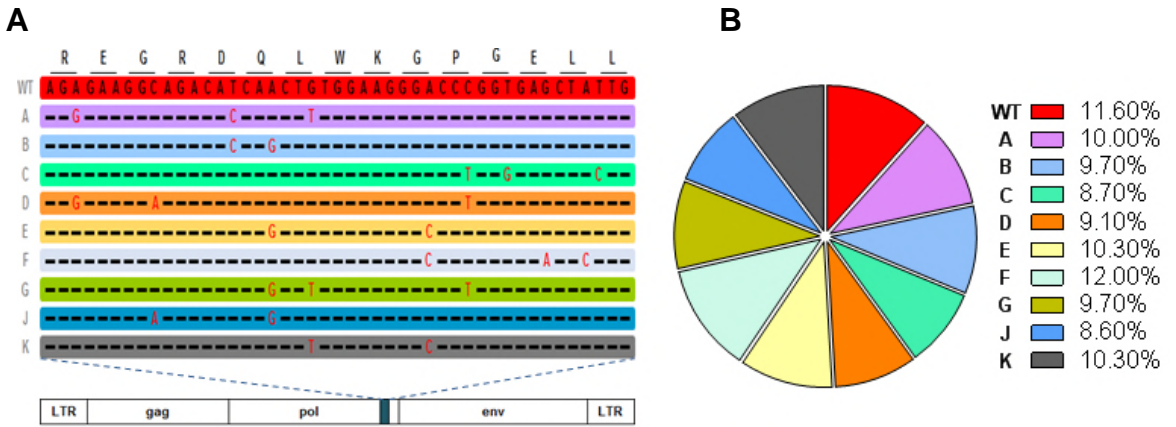

Brocca Cofano et al., Figure 1

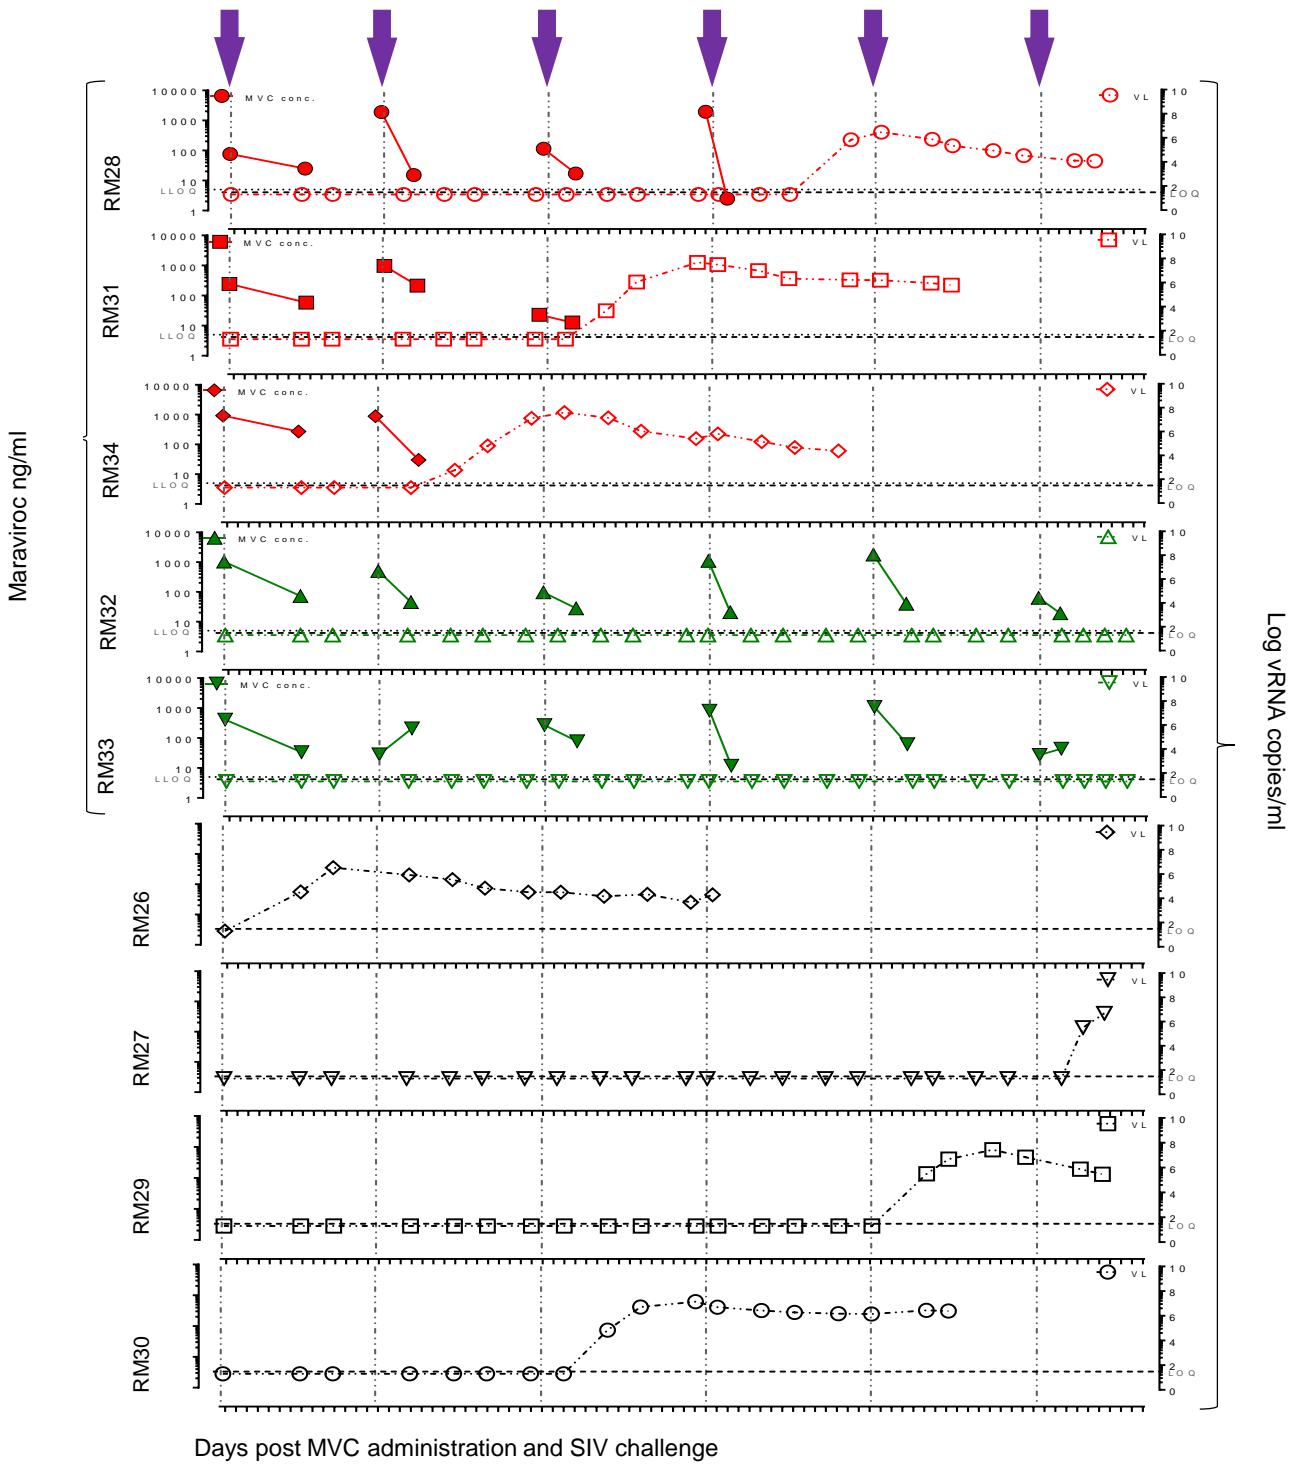

Brocca Cofano et al., Figure 2

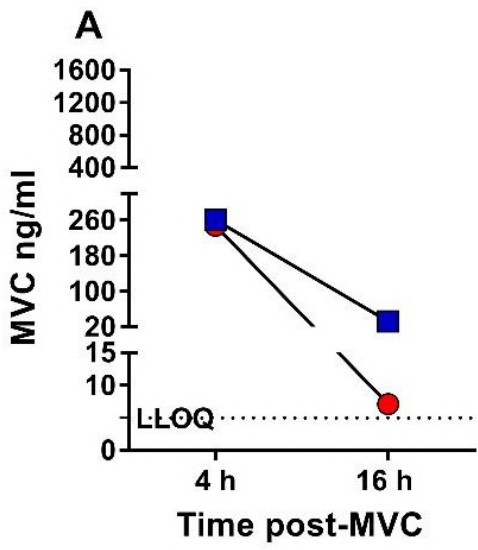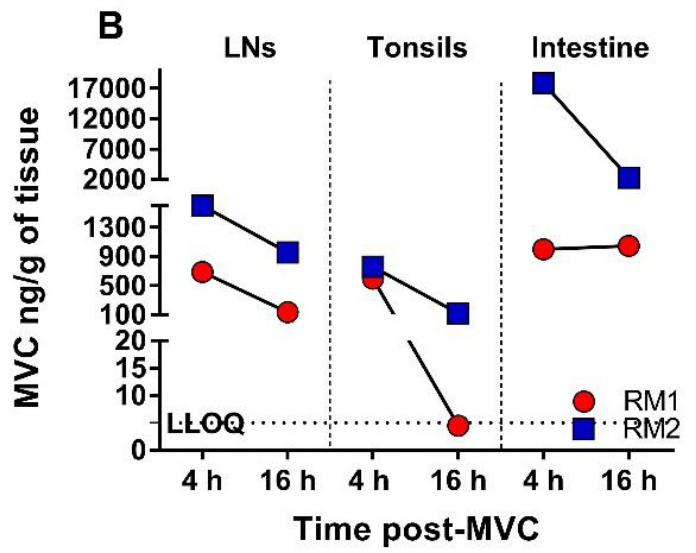

Brocca Cofano et al., Figure 3

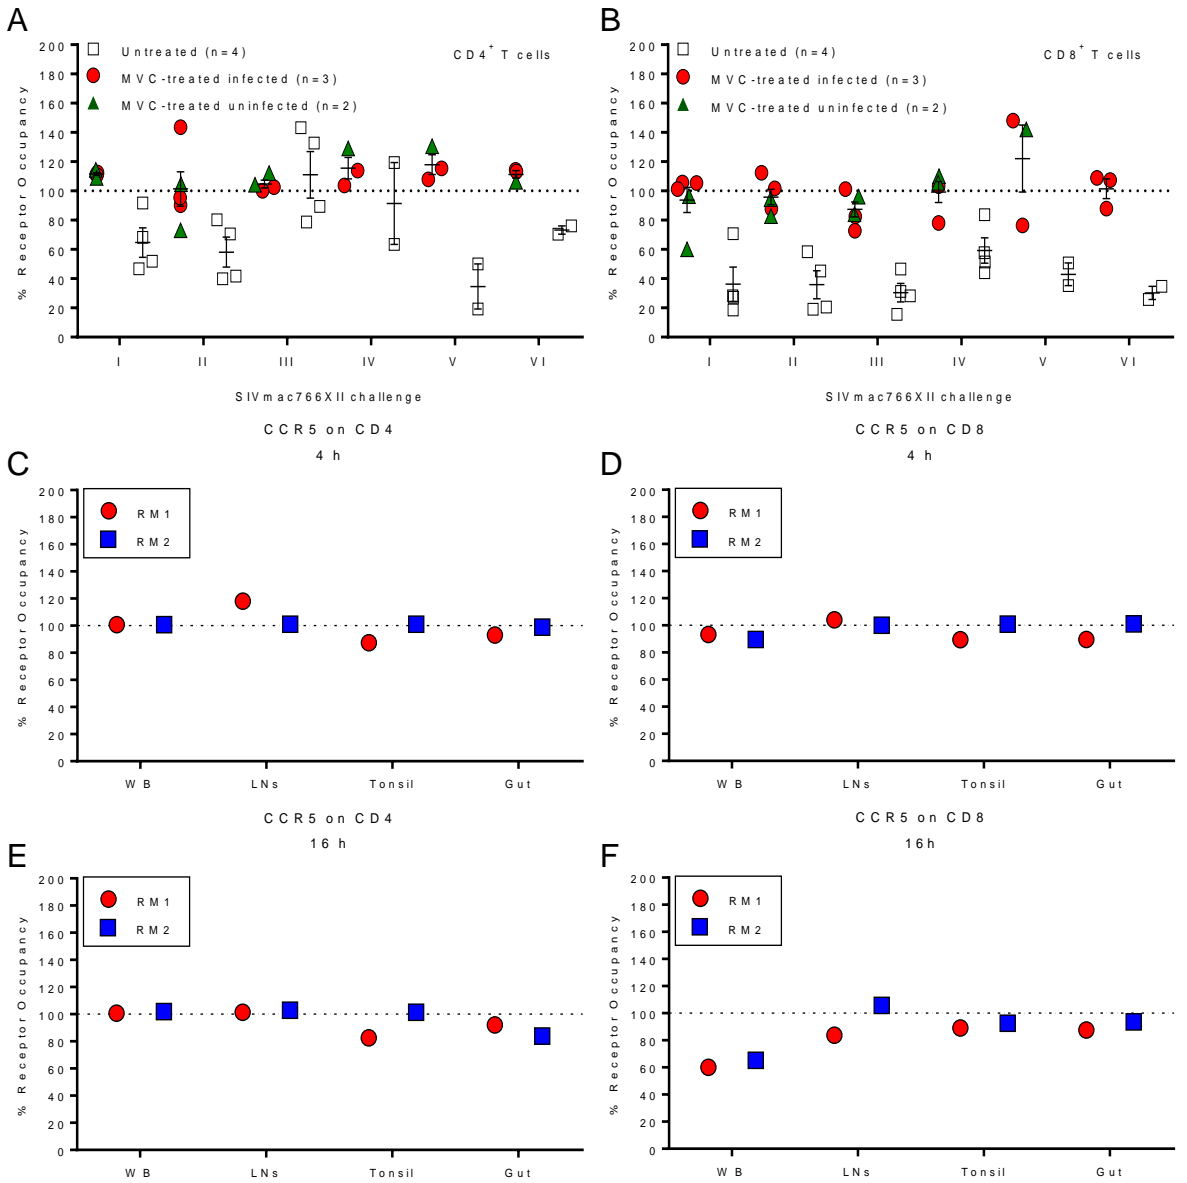

Brocca Cofano et al., Figure 4

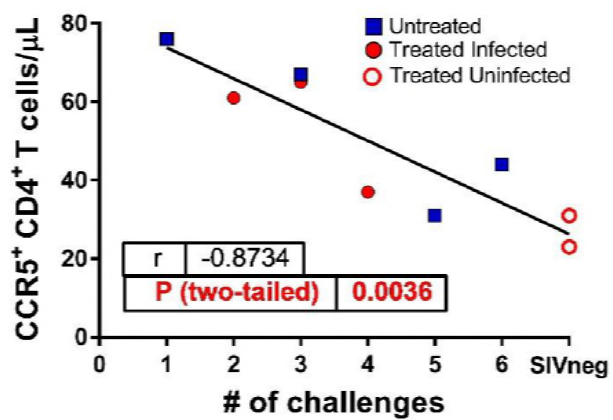

Brocca Cofano et al., Figure 5

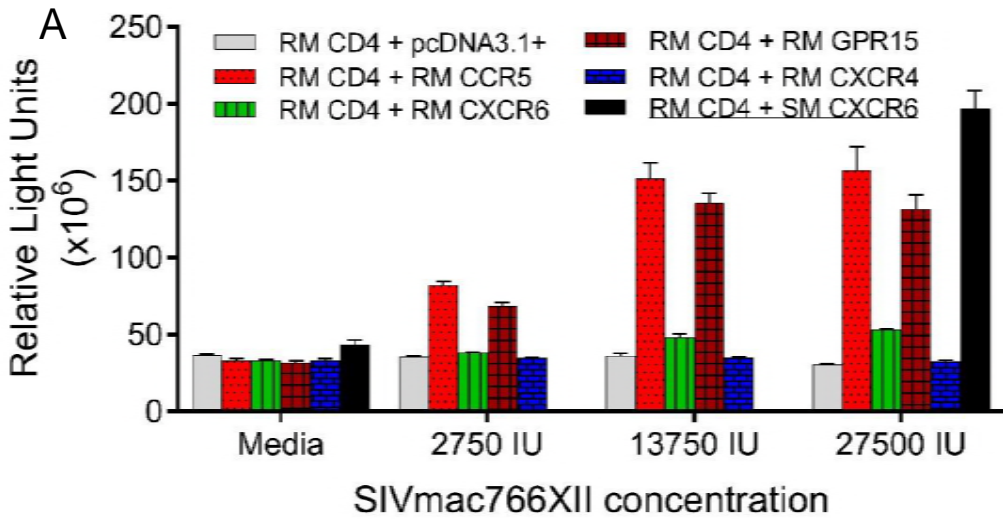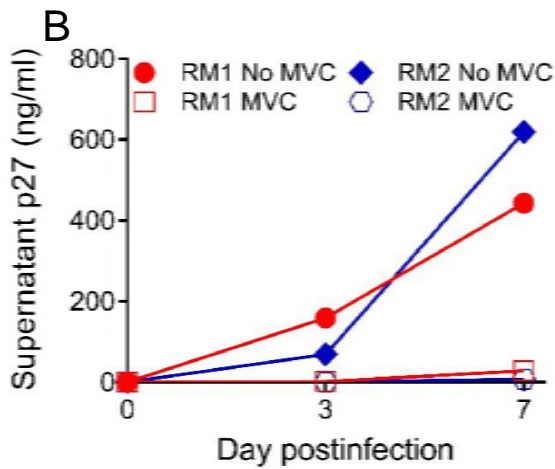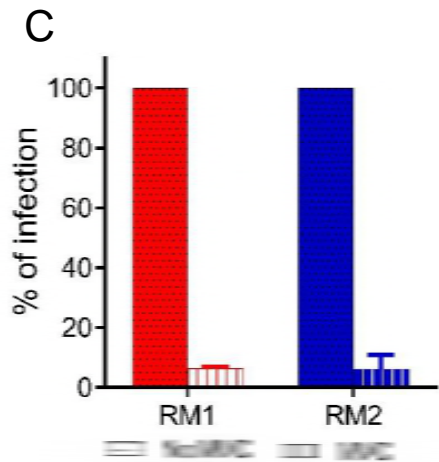

Brocca Cofano et al., Figure 6



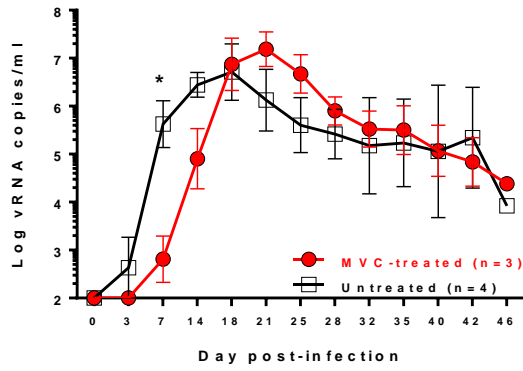

Brocca Cofano et al., Figure 7

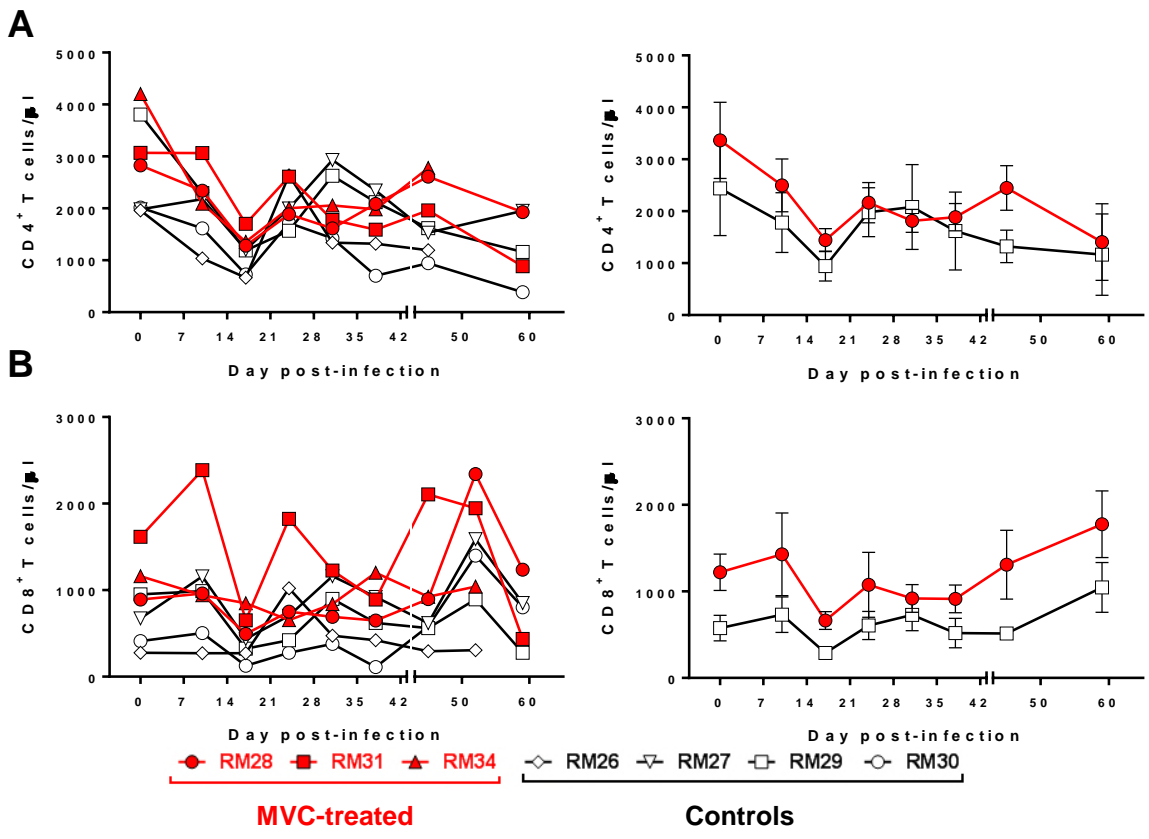

Brocca Cofano et al., Figure 8

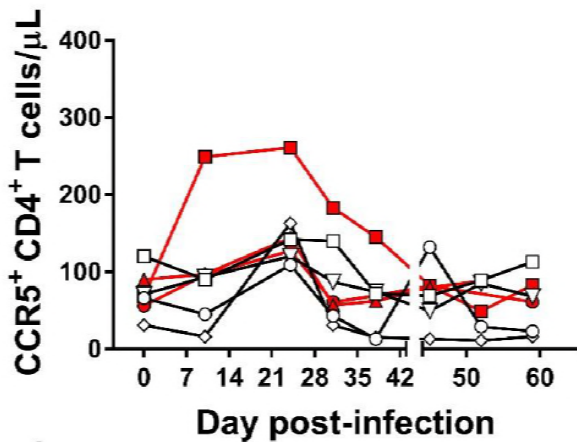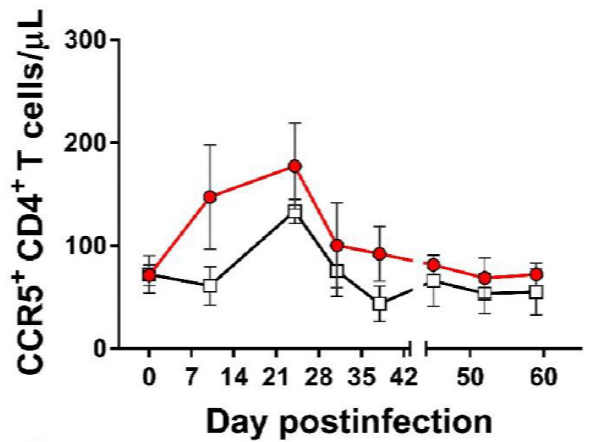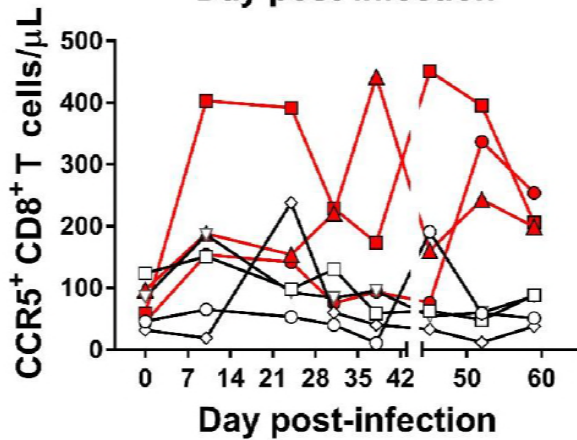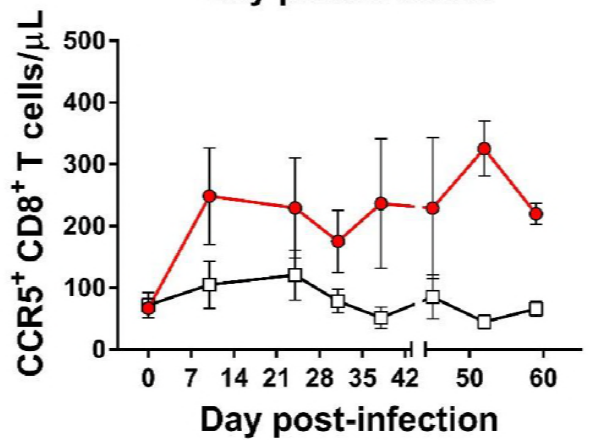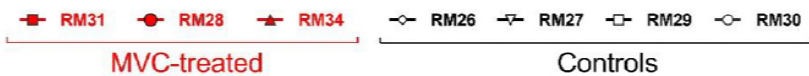

Brocca Cofano et al., Figure 9

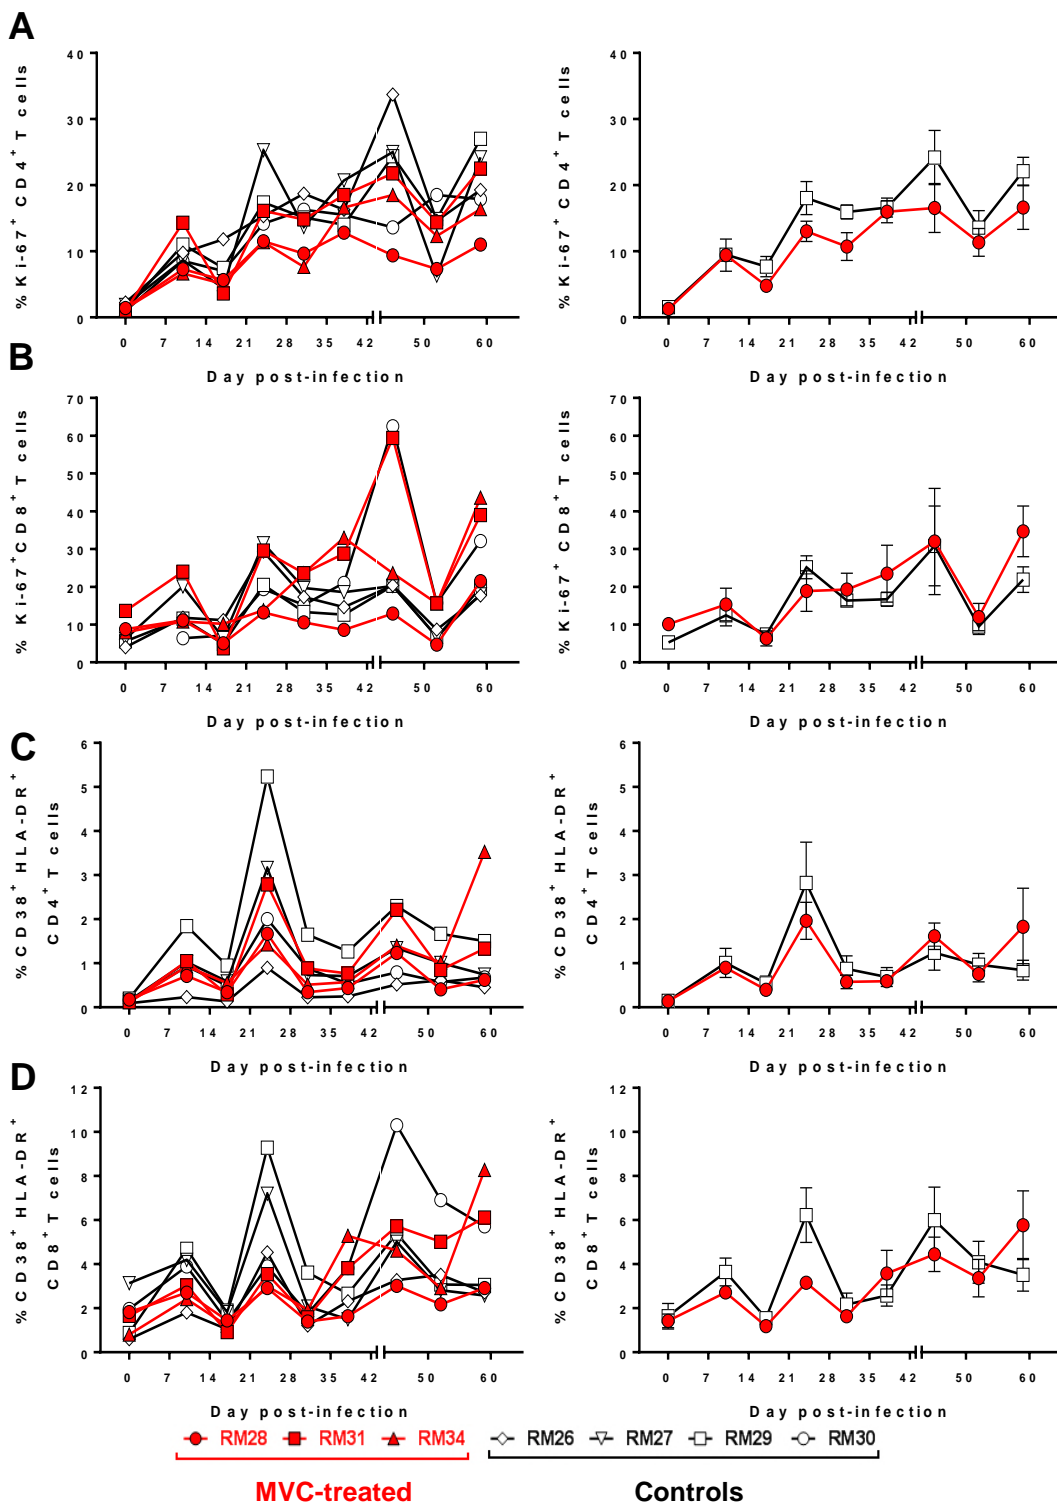

Brocca Cofano et al., Figure 10

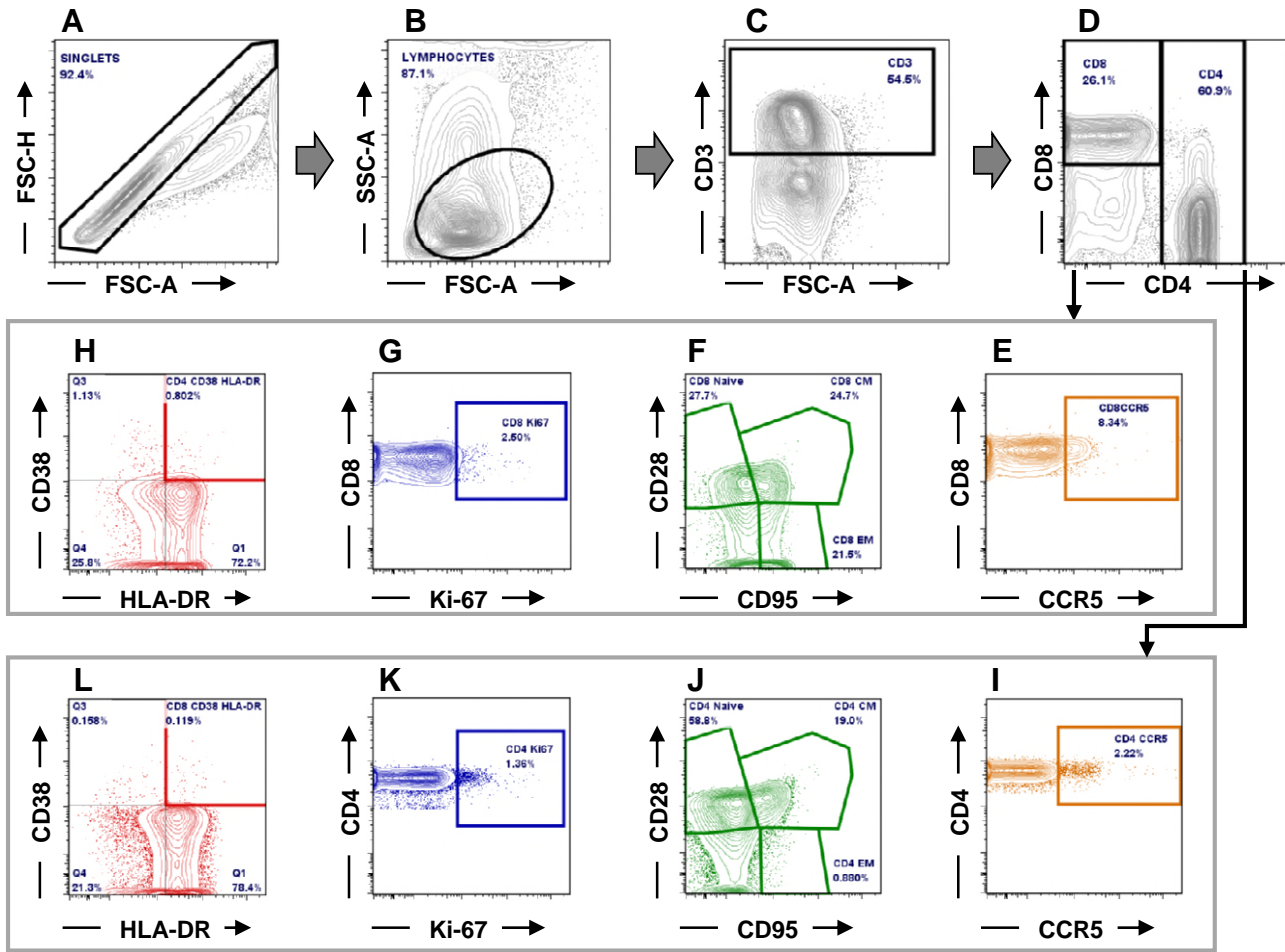

Brocca Cofano et al., Figure 11
